# Supplementary material for: A molecular filter for the cnidarian stinging response
Source: eLife. 2020 May 26;9:e57578. doi: 10.7554/eLife.57578 (PMC7250568; doi:10.7554/eLife.57578)
Supplement: Figure 1—source data 1. [file elife-57578-fig1-data1.xlsx]

## Sheet: Fig 1
Fig 1D
inactivation
nematocyte															neuron
mV	normalized current
-110	1	1	1	1	1	1	1	1	1	1	1	1	1		1	1	1	1	1	1	1	1	1
-100	0.143802	0.24279	0.135987	0.205327	0.478599	0.653427	0.559748	0.82212	0.276107	0.361702	0.559748	0.704679	0.82212		0.933962	1.06835	0.934372	0.897846	0.993781	0.886809	0.683081	0.965603	0.971342
-90	0.072727	0.086707	0.066335	0.086587	0.098909	0.177252	0.157233	0.535388	0.040043	0.042553	0.157233	0.065156	0.535388		0.867925	0.905063	0.839212	0.781538	0.759609	0.844836	0.418869	0.899202	0.940671
-80	0.033058	0.036186	0.026534	0.013593	0.026323	0.054932	0.09434	0.099979	0.00921	0.01473	0.09434	0.016754	0.099979		0.716981	0.778481	0.664479	0.624615	0.5884	0.723271	0.224742	0.804004	0.887573
-70	0.013223	0.010286	0.021559	0.007717	0.018056	0.030177	0.056604	0.016349	0.011573	0.01964	0.056604	-0.00281	0.016349		0.632075	0.740506	0.449549	0.489846	0.43536	0.575937	0.119993	0.596809	0.589397
-60	0.013223	0.001113	0.023217	-0.00302	0.019121	0.018527	0.075472	0.001747	0.011883	0.006547	0.075472	0.006179	0.001747		0.360377	0.651899	0.287941	0.286154	0.245982	0.398333	0.070908	0.237619	0.16413
-50	0.024793	-0.00365	0.011609	-0.00427	0.008888	0.012703	0.062893	0.00489	0.032821	0	0.062893	-0.0003	-0.00489		0.226415	0.348101	0.132075	0.116923	0.095737	0.166258	0.058241	0.1238	0.00207
-40	0.006612	-0.00527	0.018242	0.0048	0.003263	0.017071	0.075472	0.01153	0.007333	0	0.075472	-0.01025	-0.01153		0.09434	0.101266	0.032814	0.028308	0.01747	0.034408	0.039929	0.11358	0.012598
-30	0.008264	-0.0073	0.001658	-0.01065	0.010762	0.008334	0.044025	0.02746	0.000486	0.003273	0.044025	-0.0101	-0.02746		0	0.006329	0.001641	0.002462	0.002096	0.012195	0.015165	0.120021	0.027262
-20	0.009917	-0.00699	0.003317	0.00149	0.00256	0.008334	0.037736	0.02215	0.000861	0.00491	0.037736	0.000172	-0.02215		0.00682	0	0.00082	-0.00123	0.001398	0.008817	0.013695	0.11358	0.01184
-10	0.016529	-0.01151	0.008292	0.01124	-0.00054	-0.00186	0.062893	0.03675	0.00804	0.011457	0.062893	0.002525	-0.03675		0.0008	0	-0.00082	-0.00123	0.000699	0.013586	0.01001	0.11918	0.00771
0	0.009917	-0.0053	0.004975	-0.00958	-3.9e-05	0.002509	0.062893	0.03277	0.006979	0.00982	0.062893	-0.00071	-0.03277		0.00045	0.02532	0.001641	0	0.003494	0.018633	0.010453	0.085621	0.027262
10	0.009917	0.00427	0.00995	-0.00668	0.001925	0.00979	0.056604	0.03542	0.034146	0.016367	0.056604	0.012906	-0.03542		3e-05	0	0.004922	0.004923	0.006289	0.023111	0.009362	0.013222	0.022374
20	0.006612	-0.00242	0.014925	0.00462	0.003082	0.008334	0.075472	0.02878	0.017714	0.01473	0.075472	0.009273	-0.02878		0.00421	0.031646	0.012305	0.006154	0.006289	0.021454	0.017079	0.018821	0.00695
Fig 1E
Normalized current
vehicle	Cd2+	0 Ca2+
0.92	0.015957	0.00032
1.01	0.012821	0.00124
0.87	0.045045	0.01028
0.98		0.00294
Fig 1F
Erev (mV)
0.5 Ca2+	0.5 Ca2+	5 Ca2+
26	29.7	51
25	31	54
29.5	37	53
Fig 1G
normalized discharge
+exract	+exract	+exract	+exract	-extract
3.3 Ca2+	0 Ca2+	10 Ca2+	3.3 Ca2+ + Cd2+	3.3 Ca2+
0.283947	0.136907	0.933635	0.00427286	0.00057418
0.369897	0.0144425	2.33685	0.000106989	0.00958808
0.489993	0.0844365	1.63366	0.00498835	0.0451983
1.12286	0.00311603	1.04005	0.00375129	0.0513192
1.14196	0.135049	0.940651	0.00604487	0.116934
0.995367	0.106093		0.0247545	0.0956526
1.48697	0.188417		0.0166969	0.00100482
2.10901	0.0620238		0.00363093	8.09742e-05
	0.225859			0.107655
	0.0594165			0.0019397
	0.0857437			0.0166476
	0.0872417
	0.181337
	0.00149795
	0.00712941

## Sheet: Fig 1 - suppl 1
Fig 1 - S1A
	nematocyte
mV	normalized conductance											neuron
-110						0.00304383	0.00102503	0.021599	0.011056	-0.00525		0.007092	-0.00324	-0.00057	0.00499	0.003566	0.003402	0.0131479
-100	0.00138	0.00281	-0.00258	0.00291	0.007649	0.0152972	0.00221085	0.022188	0.006357	-0.00353		0.00463	0.00403	0.003078	0.00266	0.002111	-0.00109	0.0150873
-90	-0.00151	0.00758	-0.00844	0.00728	0.005715	0.0106534	0.0107955	0.01975	0.004793	0.001528		0.003565	0.00185	0.002578	0.00214	0.000765	0.00233	0.0173479
-80	0.0033	0.01564	0.002759	0.008968	0.008101	0.0116219	0.0235995	0.020283	0.006865	0.004992		0.00116	0.005984	0.002501	0.009989	-0.00189	-0.00334	0.0246422
-70	-0.00035	0.0018	0.001931	0.012152	0.012568	0.00142045	0.00867333	0.017223	0.01078	-0.01096		0.001268	0.00216	-0.00237	0.015826	0.008274	0.003168	0.0253234
-60	0.003409	-0.00794	0.007072	0.001327	0.007899	0.00315657	0.00805381	0.020317	0.006873	-0.01114		0.005588	0.00315	0.008814	0.017278	0.028378	0.008388	0.01762
-50	-0.01566	0.002214	-0.00085	0.001461	0.016029	0.012429	0.00545581	0.01808	0.014186	0.013638		0.02593	0.012996	0.035168	0.096118	0.168547	0.031992	0.0629792
-40	-0.00089	0.003752	0.01641	-0.0065	0.05971	0.0446429	0.0438485	0.020368	0.053946	0.020709		0.862032	0.067465	0.188335	0.514542	0.533179	0.580166	0.10814
-30	0.022963	0.031625	0.130899	0.13661	0.181669	0.243845	0.426502	0.124374	0.168399	0.435889		1	1	1	1	1	1	0.436347
-20	0.253325	0.333409	0.447794	0.614962	0.843989	1	1	1	0.808348	1		0.99072	0.993265	0.943433	0.884913	0.95879	0.947727	0.910353
-10	1	1	1	1	1			0.96897	1									1
0	0.991294	0.921035	0.950454	0.966967	0.963024
10
20
Fig 1 - S1B
current density
nematocyte	spirocyte	neuron	non-neuronal
-108.73	-45	-369.68	0
-141.83	-121.43	-401.52	0
-142.16	-162.11	-275.82	0
-146.48	-58.29	-504.09
-79.346	-149.33	-554.36
	-200.2	-635.71
Fig 1 - S1C
activation (ms)			inactivation (ms)
nematocyte	neuron		nematocyte	neuron
3.05	1.08		14.3173	1.54699
4.29	1.04		13.3559	2.0355
2.89	1.3		15.4475	1.54699
3.4	0.92		22.5612	2.21684
4.4	1.18		32.1097	2.27971
3.4	1.05		28.5619	2.47567
4.9	1.3		29.8	1.78
10.8	0.9		21.25	2.21
1.54	1.2			1.63
3.27	1.1			1.09
	1.3			0.96
Fig 1 - S1D
normalized current
sweep	nematocyte						neuron
1	1	1	1	1			1	1	1	1
2	0.883773	0.69018	0.884595	0.614993			0.993687	1	1.02012	0.938767
3	0.823429	0.618683	0.811866	0.500163			0.986473	0.994337	1.06185	0.883164
4	0.770425	0.585318	0.756144	0.460297			0.978357	0.983011	1.1443	0.86416
5	0.707288	0.547186	0.699933	0.429314			0.983768	0.976215	1.04261	0.827561
6	0.643651	0.509055	0.65159	0.341675			0.988277	0.987541	1.03604	0.793073
7	0.557897	0.509055	0.567415	0.283935			0.98467	0.995469	1.0403	0.766328
8	0.49864	0.428025	0.478358	0.233128			0.975652	0.97848	1.0468	0.757178
9	0.460852	0.418492	0.45567	0.203012			0.981062	0.960358	0.998562	0.729025
10	0.388062	0.38036	0.377254	0.221103			0.971143	0.964889	1.02503	0.721986
11	0.354054	0.385127	0.346651	0.245586			0.975652	0.967154	0.993258	0.688906
12	0.301977	0.327929	0.293895	0.257719			0.968437	0.95243	1.04261	0.693129
13	0.288318	0.323163	0.293312	0.173329			0.967536	0.958093	1.08345	0.650899
14	0.291593	0.337462	0.265341	0.082331			0.957616	0.944501	1.098	0.621338
15	0.249266	0.308863	0.236469	0.109847			0.977455	0.945634	1.0254	0.642453
16	0.230355	0.285031	0.222676	0.12003			0.961223	0.950164	1.04503	0.596704
17	0.21635	0.2326	0.20666	0.160329			0.945893	0.933175	1.10631	0.585443
18	0.198777	0.304097	0.210643	0.160654			0.95491	0.91392	1.10685	0.569959
19	0.200316	0.294564	0.202944	0.064132			0.958518	0.938838	1.09528	0.56292
20	0.204998	0.270732	0.19772	0.052215			0.95491	0.936573	1.09144	0.541805
21	0.200726	0.237366	0.192297	0.05449			0.941384	0.895798	1.08698	0.518579
22	0.194402	0.242133	0.179243	0.051999			0.935973	0.90939	1.0912	0.527025
23	0.160296	0.246899	0.169636	0.033691			0.92966	0.886737	1.05816	0.510837
24	0.168127	0.251666	0.158518	0.078431			0.922446	0.883339	1.07475	0.494649
25	0.170321	0.213534	0.159749	0.049832			0.935071	0.893533	1.07744	0.500983
26	0.176172	0.204001	0.170053	0.035207			0.910723	0.891268	1.07154	0.447492
27	0.15408	0.213534	0.154088	0.062615			0.908919	0.874278	1.08369	0.475645
28	0.147647	0.189702	0.133577	0.019608			0.901705	0.862952	1.04695	0.436935
29	0.144797	0.146804	0.136638	0.003683			0.896294	0.860687	1.10717	0.462976
30	0.141226	0.175402	0.135905	0.008883			0.899901	0.855024	1.06201	0.423562
31	0.131102	0.194468	0.115746	0.015166			0.891785	0.834636	1.08175	0.413004
32	0.122275	0.194468	0.116307	0.063265			0.870142	0.842565	1.08784	0.389074
33	0.128239	0.156337	0.141695	0.008016			0.873749	0.851626	1.05566	0.375701
34	0.129906	0.156337	0.122325	0.025024			0.880062	0.840299	1.10102	0.386962
35	0.126238	0.165869	0.101725	0.042574			0.87916	0.821045	1.05684	0.400335
36	0.120963	0.132504	0.125773	0.058715			0.875553	0.821045	1.083	0.377813
37	0.107746	0.175402	0.100918	0.038241			0.853008	0.813116	1.02771	0.339806
38	0.126586	0.146804	0.12515	0.022316			0.856615	0.782535	1.0381	0.330656
39	0.101747	0.161103	0.102379	0.051674			0.861124	0.808586	1.00538	0.299687
40	0.099336	0.146804	0.112423	0.026649			0.85391	0.781403	1.0259	0.29828
41	0.097384	0.146804	0.099427	0.005742			0.852106	0.793862	0.96479	0.320098
42	0.096994	0.108672	0.108003	0.008341			0.845794	0.781403	1.02125	0.317283
43	0.104913	0.094373	0.101954	0.024808			0.85391	0.791596	1.00105	0.306726
44	0.105628	0.132504	0.10075	0.074748			0.839481	0.788199	0.946285	0.294057
45	0.089008	0.132504	0.083896	0.099339			0.843089	0.77574	1.02146	0.284203
46	0.087746	0.127738	0.090257	0.032066			0.84399	0.77574	1.00874	0.284203
47	0.095495	0.122971	0.10075	0.058499			0.827758	0.764413	1.01742	0.255346
48	0.101422	0.075307	0.099485	0.074206			0.825955	0.785933	0.92937	0.259569
49	0.083572	0.118205	0.087942	0.090456			0.814231	0.749689	0.930708	0.258865
50	0.085014	0.132504	0.092255	0.113747			0.809722	0.759883	0.960504	0.249715
51	0.084239	0.132504	0.070849	0.069982			0.814231	0.745159	0.908274	0.265903
52	0.088466	0.103905	0.08633	0.080165			0.812428	0.746291	0.933985	0.284907
53	0.089245	0.108672	0.08138	0.108764			0.807919	0.727037	0.908696	0.237046
54	0.088909	0.103905	0.082898	0.048315			0.820544	0.755352	0.919377	0.248308
55	0.081001	0.113438	0.091167	0.089048			0.810624	0.730434	0.904543	0.233527
56	0.07747	0.08484	0.084569	0.032824			0.80341	0.740628	0.813569	0.254642
57	0.067904	0.075307	0.071959	0.080923			0.796195	0.730434	0.85227	0.227193
58	0.068981	0.089606	0.064915	0.095764			0.807919	0.722506	0.890868	0.225081
59	0.067824	0.07054	0.071974	0.086231			0.787178	0.717976	0.860852	0.212412
60	0.065399	0.118205	0.085321	0.064023			0.773651	0.68966	0.865437	0.210301
61	0.075833	0.089606	0.076663	0.095981			0.766436	0.69419	0.898313	0.218043
62	0.073585	0.07054	0.064166	0.102589			0.779963	0.71118	0.799711	0.220858
63	0.0612	0.065774	0.07036	0.091864			0.767338	0.707782	0.838184	0.206781
64	0.057837	0.108672	0.063798	0.027516			0.78357	0.707782	0.810303	0.194113
65	0.088243	0.113438	0.090108	0.029791			0.774552	0.691925	0.838191	0.205374
66	0.055135	0.080073	0.059791	0.109522			0.763731	0.691925	0.89897	0.194113
67	0.07612	0.094373	0.064965	0.119705			0.762829	0.667007	0.874283	0.205374
68	0.064867	0.07054	0.070446	0.087639			0.750204	0.695323	0.792027	0.198336
69	0.068172	0.103905	0.069443	0.07269			0.741186	0.677201	0.851214	0.194816
70	0.072216	0.056241	0.06265	0.037591			0.734874	0.656814	0.802504	0.184963
71	0.083097	0.075307	0.088375	0.063807			0.734874	0.656814	0.772153	0.218747
72	0.058257	0.094373	0.064201	0.092731			0.741186	0.660211	0.725904	0.189186
73	0.05635	0.056241	0.072089	0.134005			0.728561	0.645487	0.754832	0.182147
74	0.06463	0.094373	0.058858	0.117105			0.713231	0.634161	0.810367	0.166663
75	0.062081	0.099139	0.062603	0.110714			0.71774	0.677201	0.8257	0.160329
76	0.044566	0.07054	0.040407	0.069332			0.724954	0.638692	0.790311	0.178628
77	0.03549	0.065774	0.045225	0.137038			0.716838	0.637559	0.780839	0.161032
78	0.053119	0.065774	0.045524	0.101614			0.726758	0.650018	0.79317	0.167367
79	0.05821	0.080073	0.045559	0.140396			0.720445	0.647753	0.779615	0.157513
80	0.054168	0.07054	0.053494	0.06554			0.725856	0.661344	0.77303	0.165255
81	0.057139	0.108672	0.049114	0.065865			0.720445	0.657946	0.788548	0.173701
82	0.046051	0.07054	0.060119	0.110822			0.712329	0.619437	0.759959	0.169478
83	0.055491	0.108672	0.04399	0.082981			0.70782	0.636426	0.726399	0.175109
84	0.036817	0.056241	0.031158	0.079298			0.708722	0.638692	0.814196	0.161736
85	0.055093	0.075307	0.050878	0.064998			0.705115	0.618304	0.774438	0.159625
86	0.055416	0.061007	0.044028	0.132705			0.687079	0.597917	0.776947	0.175813
87	0.058763	0.056241	0.059936	0.12523			0.686177	0.602447	0.71642	0.181444
88	0.048668	0.07054	0.0601	0.134763			0.677159	0.614906	0.719458	0.165255
89	0.042091	0.046708	0.047294	0.117214			0.675356	0.604713	0.706009	0.184963
90	0.051525	0.07054	0.039137	0.099989			0.676257	0.591121	0.690421	0.159625
91	0.045242	0.051474	0.049588	0.115589			0.687079	0.604713	0.683004	0.182851
92	0.053388	0.065774	0.046195	0.092081			0.660927	0.579795	0.675837	0.154698
93	0.05129	0.080073	0.044522	0.132163			0.664534	0.563938	0.682616	0.152586
94	0.03512	0.051474	0.036542	0.097931			0.659123	0.57753	0.669823	0.176517
95	0.056814	0.099139	0.035205	0.128263			0.655516	0.574132	0.697693	0.160329
96	0.03539	0.080073	0.033915	0.106489			0.641088	0.550347	0.630314	0.161032
97	0.053623	0.051474	0.048085	0.095873			0.658222	0.571866	0.679507	0.170886
98	0.023174	0.022876	0.033585	0.119922			0.6474	0.562805	0.595532	0.155402
99	0.04637	0.056241	0.030271	0.103131			0.644695	0.548081	0.645338	0.163848
100	0.048304	0.07054	0.049611	0.124364			0.631168	0.559408	0.598151	0.164552
101	0.057472	0.037175	0.035708	0.127397			0.632971	0.554877	0.653864	0.182851
102	0.04062	0.07054	0.036633	0.114397			0.614936	0.523163	0.606737	0.156106
103	0.041115	0.056241	0.037504	0.12328			0.628463	0.558275	0.622048	0.153994
104	0.037817	0.051474	0.037912	0.150905			0.614034	0.53902	0.626434	0.158217
105	0.029623	0.056241	0.034646	0.15188			0.613132	0.519766	0.619016	0.157513
106	0.038276	0.051474	0.044939	0.135522			0.61223	0.544683	0.584871	0.157513
107	0.038073	0.056241	0.04917	0.115372			0.598703	0.507307	0.604776	0.131471
108	0.024472	0.046708	0.032467				0.609525	0.522031	0.592444	0.163144
109	0.030597	0.056241	0.018097	0.134547			0.601409	0.522031	0.546179	0.142029
110	0.035432	0.075307	0.031728	0.131838			0.601409	0.535622	0.546132	0.134287
111	0.039102	0.051474	0.047234	0.147763			0.603212	0.525429	0.540187	0.140621
112	0.031107	0.032409	0.03712	0.130213			0.589686	0.505041	0.590795	0.125137
113	0.047501	0.046708	0.039193	0.12783			0.605016	0.520898	0.570442	0.122322
114	0.032384	0.041941	0.018966	0.168346			0.58698	0.497113	0.578368	0.154698
115	0.050355	0.056241	0.048118	0.113639			0.58698	0.506174	0.527695	0.119506
116	0.024013	0.061007	0.028965	0.140396			0.578864	0.501644	0.562286	0.13851
117	0.053062	0.041941	0.047144	0.130538			0.582471	0.503909	0.533928	0.131471
118	0.073554	0.051474	0.055348	0.130863			0.590587	0.509572	0.508218	0.130064
119	0.053306	0.046708	0.052374	0.174087			0.582471	0.478991	0.491959	0.126545
120	0.040827	0.065774	0.02952	0.117972			0.568944	0.488052	0.485139	0.117395
Fig 1 - S1E
inactivation 5 mM Ca2+
mV	normalized current
-110	1	1	1
-100	0.929412	0.00939	0.554593
-90	0.156863	0.028169	0.114625
-80	0	0	-0.00395
-70	-0.00784	0	0.007905
-60	0	-0.01408	0.01581
-50	0.003922	0	0
-40	-0.00784	0.00939	0
-30	0	0.00469	0
-20	0.00392	-0.02817	0
-10	0.011765	0.004695	-0.01186
0	-0.00392	0	0.00395
10	0.011765	-0.03286	-0.00791
20	0.003922	-0.02347	0

## Sheet: Matlab source code
Matlab source code for discharge quantification
% clear tifdir = 'samplefilename'; %insert directory for tifs tiffiles = getfilenames(tifdir,'*.tif'); %collects filenames of any files with .tif extension close all %% x = 0; y = 200; h = 400; w = 1500; hFig = figure(1); set(hFig, 'Position', [x y w h]) clear x y w h for f = 1:length(tiffiles) %% Open data data = imread(tiffiles{f}); %opens tif %% remove exclusion areas clear cropdata subplot(1,…
