# Supplementary material for: A molecular filter for the cnidarian stinging response
Source: eLife. 2020 May 26;9:e57578. doi: 10.7554/eLife.57578 (PMC7250568; doi:10.7554/eLife.57578)
Supplement: Figure 2—source data 1. [file elife-57578-fig2-data1.xlsx]

## Sheet: Fig 2
Fig 2A
normalized expression (tpm)
subunit	other cells						nematocyte-enriched
b2.1	7.01793	6.1597	1.09714	1.41271	7.11023	3.89956	52.549	69.6696	133.042	23.8608	58.1945	37.9305
b2.2	2.36824	1.24817	3.25353	0.930755	2.22641	1.86543	3.57753	0	1.61927	8.87e-07	2.72709	3.03026
b2.3	19.9245	2.64969	12.607	6.46034	17.9696	4.77655	2.4754	4.53024	1.09498	2.47404	4.67751	0.0766787
Fig 2B
activation/inactivation
nematocyte														neuron
activation							inactivation							activation											activation
mV	normalized current						mV	normalized current						mV	normalized current										mV	normalized current
-120							-120	1	1	1	1	1		-120											-120	1	1	1	1	1	1	1	1	1	1
-110							-110	0.833049	0.831068	0.627119	0.609549	0.761687		-110											-110	1.07583	0.961832	0.95935	1.01181	1.00838	0.991658	0.971233	0.993548	0.952405	0.900384
-100	0.00864569	0.0102056	0.00522822	0.00496066	-0.00082746		-100	0.70954	0.71165	0.440678	0.383775	0.542221		-100	0.0190334	-0.0427372	0.00227717	0.00162157	0.0207491						-100	0.924171	0.925573	0.982764	0.996063	0.999162	0.971846	0.947945	0.970968	0.969217	0.764418
-90	0.00552869	0.0100793	0.0201108	0.00470741	0.00176032		-90	0.606474	0.598058	0.333333	0.215861	0.4174		-90	0.0115965	-0.0534542	-0.0104807	-0.0002884	0.0197516						-90	0.881517	0.898855	0.990244	0.989764	0.991625	0.956204	0.924658	0.912903	0.970536	0.54107
-80	0.00526048	0.00361238	0.00119942	0.00631066	-0.00322297		-80	0.444429	0.517476	0.268362	0.146874	0.36035		-80	0.0450187	-0.0206458	-0.0249283	0.00958359	0.0159446	-0.00297	0.001984	0.004044	-0.00121938		-80	0.910427	0.875954	0.961789	1.01732	1.02513	0.930136	0.9	0.858065	0.940735	0.221251
-70	0.005659	0.00585911	0	0.00340184	0.00317004		-70	0.358262	0.469903	0.220339	0.104592	0.246238		-70	-0.013367	-0.047474	0.0184112	0.00233179	0.0172623	-0.00142	0.009892	0.012434	-0.000653397		-70	0.958294	0.85687	0.976016	0.998425	1.00503	0.924922	0.878082	0.867742	0.939551	0.103111
-60	0.00229607	0.00956642	0.00703106	0.0029521	0.00497404		-60	0.163714	0.282524	0.10452	0.0606919	0.187983		-60	0.0126627	-0.0557717	-0.00693582	0.00072221	0.0117609	0.00116	0	-0.01599	0.00394157		-60	0.935071	0.833969	0.935366	0.989764	0.995812	0.900938	0.872603	0.845161	0.887829	0.062566
-50	0.00416846	0.0069968	-0.0138499	0.0064509	-0.00523045		-50	0.0626917	0.225243	0.0310734	0.0347967	0.0787489		-50	0.0197193	-0.0679486	-0.00965446	0.00433658	0.0198189	-0.00169	0.006721	-0.00088	0.00137295		-50	0.835071	0.816794	0.906911	0.973228	0.987437	0.895725	0.849315	0.783871	0.712841	0.05173
-40	0.00274628	0.00645762	0.0135934	0.00177729	-0.00092246		-40	0.0115162	0.0163107	0.00672316	0.00421808	0.00652511		-40	0.0368419	-0.060265	0.0058468	-0.00086811	0.0105202	0.006532	-0.00345	0.001964	0.00865706		-40	0.811374	0.70229	0.813008	0.969291	0.980737	0.870699	0.846575	0.754839	0.181584	0.030059
-30	0.0274031	0.00038972	0.0189675	0.0286991	0.00915807		-30	0.00681431	0.00485437	0.0112994	0.00415942	0.00692109		-30	0.105834	0.0261734	0.0154217	0.0212444	0.0300847	0.003643	0.025267	-0.00333	0.0104432		-30	0.582938	0.400763	0.786585	0.959843	0.967337	0.862357	0.819178	0.696774	0.0758405	0.008738
-20	0.110454	0.118466	0.0837066	0.108301	0.0272286		-20	0.0076661	0.00485437	0.00259887	0.00390046	0.0187891		-20	0.0378318	0.156825	0.0527754	0.135986	0.120127	0.031771	0.11423	0.025463	0.0372743		-20	0.516588	0.232824	0.737805	0.869291	0.883585	0.821689	0.779452	0.56129	0.0181651	0.005243
-10	0.558944	0.488073	0.417688	0.603206	0.330465		-10	0.00170358	0.0038835	0.0112994	0.0643334	0.00439369		-10	0.18189	0.782744	0.504774	0.687546	0.670565	0.340376	0.485787	0.128533	1		-10	0.483412	0.164122	0.371138	0.408661	0.39196	0.665276	0.621918	0.345161	-0.00490514	0.002447
0	1	0.938231	0.870947	1	1		0	0.0076661	0	0.00282486	0.0364151	0.00333314		0	0.714065	1	1	1	1	0.996108	0.956773	0.615132	0.942177		0	0.322275	0.135496	0.137398	0.13937	0.123953	0.266945	0.294521	0.132258	-0.00828735	0.00734
10	0.980422	1	1	0.994244	0.954135		10	0.00511073	0.0038835	0.0112994	0.0313575	0.00401722		10	1	0.942036	0.904337	0.950637	0.967951	1	1	0.964792	0.802416		10	0.175355	0.137405	0.20935	0.0708661	0.061139	0.0323253	0.0671233	0.0548387	-0.0126176	0.008738
20		0.858981	0.992317	0.873163			20	0.00851789	0.00291262	0.0254237	0.0131499	0.00344333		20						0.893966		1			20	0.132701	0.127863	0.158537	0.0598425	0.061139	0.0302398	0.00273973	0.0419355	0	0.016078
																															0.0573514	0	0
Fig 2C
normalized current
s	nCav									mCav
5	1	1	1	1	1	1	1	1		1	1	1	1	1	1
10	0.943802	0.957215	0.998447	0.983265	0.998865	1	0.829787	0.629177		0.987007	1.00729	1	0.987741	0.981575	0.989763
15	0.917617	0.773282	0.964905	0.965876	0.968918	0.791652	0.907801	0.508278		0.972486	1.00547	0.981132	1.00175	0.976549	0.99181
20	0.925974	0.744642	0.954568	0.952914	0.972859	0.730884	0.921986	0.489453		0.964078	0.996353	1.00943	0.985989	0.974874	0.973383
25	0.898952	0.678451	0.932353	0.938054	0.937396	0.765609	0.851064	0.445946		0.955671	0.981765	0.990566	0.984238	0.951424	0.961098
30	0.880009	0.635809	0.910139	0.920981	0.916512	0.652754	0.865248	0.417917		0.941914	0.976294	0.993711	0.991243	0.938023	0.97543
35	0.863295	0.607806	0.895622	0.911496	0.901933	0.600667	0.943262	0.39951		0.932743	0.97447	0.996855	0.980736	0.941374	0.969288
40	0.843238	0.552435	0.872528	0.894424	0.870805	0.644073	0.87234	0.363115		0.91975	0.967176	0.996855	0.966725	0.926298	0.96724
45	0.837388	0.534615	0.86505	0.879248	0.872381	0.513855	0.829787	0.351402		0.913635	0.965353	1.00314	0.985989	0.919598	0.954955
50	0.812595	0.53907	0.847014	0.86091	0.844799	0.444406	0.87234	0.35433		0.902935	0.952588	1.00314	0.970228	0.906198	0.948813
55	0.783066	0.539706	0.82359	0.842257	0.808548	0.522536	0.843972	0.354749		0.895292	0.948941	0.984277	0.97373	0.901173	0.952908
60	0.852709	0.561345	0.819411	0.817596	0.88105	0.453087	0.829787	0.368972		0.88765	0.94347	0.974843	0.971979	0.891122	0.948813
65	0.808138	0.588712	0.82172	0.795149	0.838889	0.591986	0.815603	0.38696		0.878478	0.950764	0.962264	0.963222	0.887772	0.946766
70	0.766073	0.595713	0.801705	0.773649	0.785301	0.487812	0.843972	0.391562		0.875421	0.938	0.981132	0.95972	0.881072	0.928338
75	0.737659	0.610988	0.779051	0.757209	0.757325	0.47913	0.787234	0.401602		0.863192	0.936176	0.968553	0.968476	0.879397	0.936528
80	0.796716	0.616716	0.78323	0.746143	0.821551	0.392319	0.787234	0.405367		0.863192	0.930705	0.959119	0.963222	0.879397	0.938576
85	0.755488	0.616716	0.78048	0.73982	0.77939	0.279464	0.836879	0.405367		0.855549	0.925235	0.959119	0.95972	0.879397	0.932433
90	0.741559	0.643447	0.766953	0.729387	0.762053	0.401	0.780142	0.422937		0.856314	0.927058	0.965409	0.961471	0.855946	0.862819
95	0.788081	0.650448	0.74188	0.730335	0.815641	0.236058	0.780142	0.427539		0.818099	0.927058	0.962264	0.952715	0.850921	0.883294
100	0.762452	0.744642	0.746388	0.726541	0.784119	0.305507	0.787234	0.489453		0.826506	0.916117	0.981132	0.957968	0.840871	0.924243
105	0.756881	0.772645	0.706711	0.71393	0.778208	0.236058	0.794326	0.507859		0.825742	0.91247	0.987421	0.966725	0.845896	0.897626
110	0.730416	0.737641	0.652972	0.716261	0.74511	0.279464	0.794326	0.484851		0.821921	0.896058	0.949686	0.971979	0.849246	0.905816
115	0.718995	0.715365	0.636043	0.704879	0.732107	0.236058	0.744681	0.470209		0.822685	0.901529	0.95283	0.971979	0.834171	0.907863
120	0.718716	0.692453	0.644276	0.700054	0.729742	0.053754	0.77305	0.455149		0.824978	0.901529	0.962264	0.947461	0.835846	0.901721
125	0.700888	0.684816	0.639108	0.708872	0.707283	0.123203	0.70922	0.450129		0.829564	0.890588	0.955975	0.956217	0.837521	0.909911
130	0.67888	0.612261	0.62855	0.71496	0.678913	0.192652	0.723404	0.402439		0.826506	0.890588	0.943396	0.95972	0.834171	0.887389
135	0.712588	0.58553	0.648645	0.709387	0.721468	0.201333	0.687943	0.384869		0.824214	0.890588	0.974843	0.957968	0.835846	0.885341
140	0.685009	0.57662	0.616226	0.704843	0.693098	0.183971	0.723404	0.379012		0.821156	0.883293	0.959119	0.957968	0.839196	0.885341
145	0.663002	0.534615	0.606116	0.693344	0.66591	0.053754	0.659574	0.351402		0.818099	0.885117	0.984277	0.956217	0.830821	0.875104
150	0.66523	0.472879	0.613359	0.681962	0.668274	0.001667	0.70922	0.310823		0.810456	0.875999	0.977987	0.950963	0.825796	0.887389
155	0.648795	0.491336	0.603241	0.674374	0.648966	0.088478	0.730496	0.322955		0.798992	0.870529	0.95283	0.952715	0.819095	0.885341
160	0.705623	0.518067	0.586047	0.686072	0.708859	0.131884	0.716312	0.340525		0.800521	0.857764	0.962264	0.93345	0.81742	0.875104
165	0.670245	0.504065	0.61519	0.669632	0.670638	0.123203	0.680851	0.331322		0.798228	0.868705	0.968553	0.947461	0.805695	0.856677
170	0.66523	0.480517	0.612331	0.659831	0.671032	0.149246	0.659574	0.315843		0.798228	0.861411	0.955975	0.950963	0.802345	0.883294
175	0.658266	0.463969	0.600124	0.670897	0.66394	0.123203	0.64539	0.304967		0.791349	0.848646	0.955975	0.949212	0.802345	0.848487
180	0.64183	0.459514	0.604963	0.668684	0.63951	-0.0157	0.652482	0.302038		0.789056	0.848646	0.943396	0.949212	0.788945	0.864866
185	0.638766	0.469061	0.591216	0.663309	0.626507	0.010348	0.631206	0.308313		0.782942	0.868705	0.949686	0.949212	0.79062	0.862819
190	0.623444	0.461423	0.597045	0.65414	0.609564	0.157928	0.602837	0.303293		0.781413	0.874176	0.955975	0.947461	0.792295	0.844392
195	0.598652	0.449331	0.593526	0.651611	0.581193	0.09716	0.588652	0.295345		0.77912	0.863235	0.95283	0.949212	0.78392	0.856677
200	0.627066	0.435329	0.547007	0.644023	0.62099	0.079797	0.531915	0.286142		0.776063	0.859587	0.946541	0.940455	0.78727	0.844392
205	0.601159	0.446785	0.566362	0.653508	0.582375	0.053754	0.524823	0.293672		0.773006	0.859587	0.962264	0.940455	0.782245	0.846439
210	0.573859	0.448058	0.569991	0.655405	0.544155	0.140565	0.510638	0.294508		0.767656	0.844999	0.95283	0.935201	0.79062	0.852582
215	0.544609	0.441057	0.565372	0.651611	0.50948	0.045073	0.432624	0.289907		0.769949	0.846823	0.962264	0.931699	0.775544	0.840297
220	0.62818	0.424509	0.457159	0.641494	0.607199	0.071116	0.58156	0.27903		0.766128	0.846823	0.95283	0.93345	0.79062	0.825964
225	0.598373	0.427692	0.501478	0.642126	0.576071	-0.0157	0.546099	0.281121		0.763835	0.848646	0.955975	0.940455	0.78057	0.840297
230	0.556866	0.428328	0.53293	0.636119	0.526817	0.053754	0.539007	0.28154		0.762306	0.839529	0.965409	0.940455	0.772194	0.848487
235	0.601159	0.434056	0.436044	0.639913	0.581981	-0.03306	0.531915	0.285305		0.76307	0.828587	0.949686	0.942207	0.78057	0.838249
240	0.589737	0.425146	0.444182	0.63106	0.557158	0.045073	0.439716	0.279448		0.756956	0.834058	0.962264	0.936953	0.788945	0.836202
245	0.55213	0.425146	0.483552	0.621891	0.518543	-0.11987	0.546099	0.279448		0.756956	0.830411	0.959119	0.928196	0.78392	0.834154
250	0.54238	0.411144	0.477724	0.610826	0.505934	-0.12855	0.546099	0.270245		0.761542	0.82494	0.946541	0.929947	0.770519	0.836202
255	0.515637	0.415599	0.49433	0.603238	0.473623	-0.13723	0.595745	0.273173		0.75772	0.832234	0.930818	0.93345	0.775544	0.821869
260	0.50338	0.41369	0.485422	0.598812	0.456286	-0.10251	0.453901	0.271918		0.762306	0.821293	0.959119	0.924694	0.770519	0.823917
265	0.485273	0.418145	0.482783	0.588694	0.43028	0.02771	0.524823	0.274846		0.75772	0.823117	0.962264	0.922942	0.773869	0.823917
270	0.495023	0.427692	0.461888	0.582687	0.444465	-0.15459	0.539007	0.281121		0.761542	0.81947	0.962264	0.921191	0.775544	0.830059
275	0.485273	0.418781	0.45408	0.592805	0.433826	-0.14591	0.524823	0.275265		0.763835	0.810352	0.95283	0.903678	0.773869	0.821869
280	0.480537	0.403507	0.438133	0.60387	0.423188	-0.04174	0.539007	0.265225		0.758485	0.808528	0.95283	0.926445	0.763819	0.817774
285	0.473851	0.395233	0.429775	0.607032	0.418853	-0.08514	0.524823	0.259786		0.76307	0.804881	0.959119	0.921191	0.775544	0.817774
290	0.468837	0.397142	0.422407	0.601973	0.415307	-0.04174	0.51773	0.261041		0.758485	0.810352	0.949686	0.915937	0.763819	0.825964
295	0.46633	0.395869	0.407121	0.596282	0.415307	-0.11119	0.496454	0.260205		0.756192	0.788469	0.943396	0.910683	0.765494	0.815727
300	0.473294	0.405416	0.390515	0.594069	0.418065	-0.02438	0.460993	0.26648		0.75237	0.792116	0.95283	0.926445	0.767169	0.807537
305	0.469673	0.413053	0.377758	0.590275	0.410973	-0.0157	0.524823	0.2715		0.756192	0.790293	0.959119	0.910683	0.758794	0.807537
310	0.465494	0.404143	0.367861	0.587114	0.409397	-0.08514	0.51773	0.265643		0.753135	0.784822	0.95283	0.912434	0.772194	0.811632
315	0.46048	0.400961	0.348835	0.583636	0.402304	-0.11119	0.446809	0.263551		0.750078	0.784822	0.959119	0.915937	0.768844	0.807537
320	0.446273	0.407325	0.36874	0.581739	0.381815	-0.20668	0.539007	0.267735		0.751606	0.779352	0.968553	0.912434	0.768844	0.80549
325	0.446273	0.401597	0.347076	0.576364	0.384573	-0.16328	0.411348	0.26397		0.747785	0.790293	0.949686	0.922942	0.755444	0.785015
330	0.428165	0.406052	0.348615	0.567828	0.359355	-0.12855	0.439716	0.266898		0.748549	0.781175	0.946541	0.912434	0.760469	0.803442
335	0.425101	0.406052	0.337288	0.565615	0.358173	-0.16328	0.489362	0.266898		0.746256	0.786646	0.955975	0.90718	0.772194	0.795252
340	0.411451	0.407325	0.345426	0.563718	0.338865	-0.02438	0.432624	0.267735		0.743963	0.777528	0.949686	0.922942	0.758794	0.7973
345	0.396965	0.407325	0.349825	0.55613	0.312859	0.053754	0.439716	0.267735		0.744727	0.786646	0.940252	0.917688	0.757119	0.791157
350	0.386937	0.409235	0.347735	0.558027	0.299462	-0.07646	0.404255	0.26899		0.743963	0.773881	0.937107	0.90718	0.768844	0.78911
355	0.367994	0.400324	0.347076	0.560872	0.280155	-0.06778	0.411348	0.263133		0.747785	0.775705	0.949686	0.900175	0.760469	0.795252
360	0.354344	0.409235	0.344656	0.553917	0.256119	-0.07646	0.468085	0.26899		0.740142	0.76841	0.921384	0.903678	0.768844	0.799347
365	0.344315	0.404143	0.335748	0.546961	0.245086	-0.11119	0.368794	0.265643		0.739377	0.772058	0.95283	0.903678	0.762144	0.782967
370	0.337072	0.395233	0.33047	0.541902	0.231295	-0.09383	0.35461	0.259786		0.734792	0.761116	0.933962	0.900175	0.758794	0.793205
375	0.345429	0.399688	0.304846	0.536844	0.255331	-0.20668	0.390071	0.262715		0.737849	0.759293	0.955975	0.894921	0.755444	0.793205
380	0.357408	0.400961	0.280982	0.54127	0.272668	-0.11119	0.326241	0.263551		0.732499	0.76841	0.940252	0.905429	0.752094	0.787062
385	0.370222	0.402234	0.252938	0.53305	0.290006	-0.12855	0.333333	0.264388		0.737085	0.761116	0.927673	0.903678	0.760469	0.791157
390	0.363258	0.399052	0.253708	0.531153	0.281731	-0.21536	0.368794	0.262296		0.730206	0.750175	0.915094	0.903678	0.765494	0.778872
395	0.353229	0.397779	0.268775	0.521668	0.264788	-0.21536	0.333333	0.26146		0.729442	0.753822	0.90566	0.900175	0.752094	0.778872
400	0.335958	0.390778	0.280542	0.51819	0.238388	-0.06778	0.361702	0.256858		0.728677	0.759293	0.924528	0.900175	0.750419	0.785015
405	0.333451	0.392051	0.274823	0.517558	0.2376	-0.22404	0.347518	0.257695		0.726385	0.761116	0.933962	0.889667	0.758794	0.766588
410	0.322587	0.390141	0.281641	0.511235	0.219868	-0.12855	0.404255	0.25644		0.724856	0.746528	0.924528	0.896673	0.762144	0.778872
415	0.319801	0.399688	0.278342	0.515977	0.211594	-0.198	0.35461	0.262715		0.726385	0.746528	0.937107	0.900175	0.752094	0.78092
420	0.313115	0.395869	0.274163	0.515977	0.206077	0.010348	0.255319	0.260205		0.72562	0.751999	0.91195	0.896673	0.742044	0.77273
425	0.305315	0.401597	0.271744	0.51819	0.191498	-0.07646	0.297872	0.26397		0.728677	0.739234	0.937107	0.896673	0.730318	0.785015
430	0.296679	0.401597	0.268225	0.515977	0.1848	-0.11987	0.304965	0.26397		0.721799	0.735587	0.940252	0.884413	0.731993	0.778872
435	0.289715	0.40478	0.269544	0.508073	0.170221	-0.25009	0.248227	0.266061		0.723327	0.744704	0.937107	0.894921	0.716918	0.774777
440	0.289994	0.396506	0.263606	0.502698	0.172585	-0.18064	0.283688	0.260623		0.721035	0.742881	0.930818	0.882662	0.728643	0.77273
445	0.287765	0.400961	0.257667	0.507125	0.172191	-0.12855	0.304965	0.263551		0.715685	0.73741	0.937107	0.891419	0.716918	0.776825
450	0.282751	0.404143	0.252829	0.504279	0.169039	-0.22404	0.248227	0.265643		0.716449	0.741057	0.921384	0.879159	0.708543	0.795252
455	0.277736	0.401597	0.251179	0.503331	0.155248	-0.09383	0.198582	0.26397		0.718742	0.724646	0.930818	0.889667	0.716918	0.77273
460	0.271051	0.401597	0.251069	0.494794	0.146973	-0.22404	0.219858	0.26397		0.718742	0.724646	0.937107	0.89317	0.711893	0.768635
465	0.263808	0.401597	0.24843	0.480883	0.138304	-0.28481	0.241135	0.26397		0.711863	0.708234	0.930818	0.896673	0.711893	0.774777
470	0.258236	0.400961	0.244581	0.477089	0.127666	-0.28481	0.276596	0.263551		0.71492	0.713704	0.937107	0.889667	0.705193	0.770682
475	0.261858	0.394596	0.232264	0.477089	0.141063	-0.18932	0.248227	0.259368		0.714156	0.726469	0.927673	0.884413	0.695142	0.766588
480	0.259072	0.397779	0.224895	0.474244	0.142639	-0.26745	0.191489	0.26146		0.717213	0.728293	0.937107	0.880911	0.696817	0.760445
485	0.257122	0.400961	0.218077	0.473295	0.146185	-0.25009	0.219858	0.263551		0.711863	0.711881	0.924528	0.889667	0.691792	0.776825
490	0.250436	0.399052	0.219837	0.470766	0.126483	-0.11987	0.22695	0.262296		0.714156	0.719175	0.937107	0.896673	0.693467	0.754303
495	0.242636	0.399688	0.216427	0.470134	0.115451	-0.21536	0.219858	0.262715		0.711099	0.700939	0.95283	0.877408	0.681742	0.770682
500	0.243751	0.395869	0.2062	0.468869	0.124513	-0.35426	0.198582	0.260205		0.710334	0.704587	0.930818	0.884413	0.661642	0.762493
505	0.240408	0.399688	0.20411	0.466972	0.121361	-0.1415		0.262715
Fig 2D
normalized curent
s	nCav								mCav
0	1	1	1	1	1	1	1		1	1	1	1	1	1
3	0.684725	0.570681	0.62963	0.566138	0.28	0.162651	0.508049		1.01474	0.964728	0.914192	0.986036	0.892701	1.01301
5	0.49935	0.408377	0.439153	0.380952	0.24	0.125	0.472671		0.97914	0.944489	0.874062	0.974067	0.85788	1.00186
7	0.390588	0.308901	0.358025	0.285714	0.04	0.021084	0.428304		0.976214	0.934301	0.872104	0.974067	0.840598	1
9	0.324372	0.219895	0.352734	0.201058	0	0.039157	0.399886		0.949395	0.92604	0.838499	0.959505	0.824865	0.988541
11	0.249675	0.167539	0.352734	0.121693	0	0.048193	0.392926		0.943543	0.919294	0.836215	0.960702	0.814805	0.979251
11.1	0.314112	0.219895	0.455026	0.169312	0.2	0.033133	0.424824		0.92262	0.853942	0.796411	0.935169	0.809131	0.945184
11.6	0.733975	0.543245	0.897766	0.561911	0.366211	0.303337	0.60354		0.931548	0.886555	0.856284	0.927764	0.857987	0.962121
12.1	0.773221	0.591178	0.813802	0.603893	0.292969	0.560715	0.624779		0.964286	0.894118	0.860267	0.943592	0.861136	0.967792
12.6	0.804533	0.655089	0.783661	0.61681	0.610352	0.689403	0.649558		0.96131	0.905882	0.878189	0.942374	0.861136	0.945109
13.1	0.824574	0.683849	0.779355	0.684627	0.488281	0.643443	0.60531		0.946429	0.918487	0.870224	0.948462	0.886324	0.973463
13.6	0.838351	0.690241	0.767514	0.694315	0.561523	0.661827	0.628319		0.952382	0.917647	0.880181	0.939939	0.898919	0.956451
14.1	0.851712	0.703023	0.751368	0.739526	0.488281	0.799708	0.628319		0.952382	0.915126	0.89412	0.955767	0.889473	0.973463
14.6	0.860062	0.699827	0.744909	0.739526	0.537109	0.588291	0.624779		0.958334	0.917647	0.90806	0.960637	0.91781	0.965902
15.1	0.865072	0.731783	0.743832	0.739526	0.90332	0.836476	0.676106		0.982143	0.923529	0.914034	0.954549	0.931979	0.960231
15.6	0.871334	0.734978	0.735221	0.739526	0.78125	0.615867	0.642478		0.979167	0.92521	0.916025	0.961855	0.905216	0.992365
16.1	0.873839	0.754152	0.735221	0.784738	0.78125	0.671019	0.654867		0.994048	0.927731	0.916025	0.963072	0.931979	0.971572
17.1	0.91392	0.805281	0.780432	0.77505	0.65918	0.753747	0.702655		0.982143	0.978151	0.920008	0.9789	0.941424	0.973463
18.1	0.924358	0.792498	0.778279	0.804114	0.683594	0.8089	0.697345		0.979167	0.986555	0.935939	0.971595	0.944573	0.982914
19.1	0.930203	0.830845	0.776126	0.833178	0.927734	0.671019	0.711504		0.982143	0.991597	0.925982	0.967942	0.968187	0.979133
20.1	0.936883	0.865996	0.772897	0.829949	1.00098	0.661827	0.665487		0.955358	0.998319	0.927973	0.97403	0.966613	0.982914
21.1	0.940223	0.818063	0.772897	0.855784	1.02539	0.707787	0.692035		0.96131	0.984874	0.945896	0.965507	0.969762	0.967792
22.1	0.94064	0.834041	0.770744	0.862243	1.02539	0.781324	0.677876		1.00595	0.979832	0.935939	0.967942	0.982356	0.981023
23.1	0.941058	0.840432	0.77505	0.855784	1.02539	0.836476	0.715044		0.98512	0.983193	0.959835	0.96916	0.993376	1.01316
24.1	0.944815	0.875583	0.761056	0.852555	0.854492	0.799708	0.707965		0.982143	0.977311	0.955852	0.995946	0.996524	1.00182
25.1	0.941058	0.85641	0.763209	0.881619	1.00098	0.753747	0.723894		0.982143	0.989076	0.947887	0.991076	1.00597	0.999926
26.1	0.943145	0.850018	0.765361	0.865472	1.12305	0.753747	0.713274		0.982143	0.985714	0.965809	0.986205	1.00754	0.998035
27.1	0.944815	0.862801	0.77505	0.852555	1.19629	0.790516	0.711504		0.994048	0.984034	0.963818	0.98864	1.01542	1.00749
28.1	0.946903	0.85641	0.765361	0.865472	0.952148	0.928396	0.746903		1	0.956303	0.98174	0.989858	1.03431	0.996145
29.1	0.947738	0.865996	0.761056	0.855784	0.78125	0.735363	0.730973		1.00893	0.978992	0.985723	1.00203	1.03903	1.00371
30.1	0.946485	0.859605	0.759979	0.87839	1.07422	0.873244	0.769912		0.982143	0.985714	0.971783	0.998381	1.03273	0.999926
Fig 2F
inactivation
nCav								nCav + mB
mV	normalized current
-110	1	1	1	1	1	1		1	1	1	1	1	1
-100	0.937143	0.900518	0.832905	0.724314	0.850214	0.994881		0.997698	1	1.00316	0.990517	0.99901	0.932382
-90	0.897143	0.868394	0.771208	0.650287	0.704108	0.533208		0.993962	0.990415	1.00316	1.01438	0.966113	0.872611
-80	0.857143	0.807254	0.670951	0.514359	0.635692	0.38015		0.982751	1.02236	1	0.998472	1.01507	0.89172
-70	0.748571	0.704663	0.496144	0.239949	0.393766	0.363296		0.967805	0.971246	1.00316	1.04621	0.961127	0.936306
-60	0.466939	0.360622	0.169666	0.00255265	0.200285	0.303371		0.945384	0.990415	0.981013	1.01041	0.982271	0.904459
-50	0.131429	0.0746114	-0.00257069	0.0248883	0.150357	0.169788		0.911754	1.01278	1.00949	1.05019	0.984796	0.872611
-40	0.0236735	0.0124352	-0.00514139	0.0350989	0.102867	0.0717853		0.87065	1.00319	1	1.00643	0.988131	0.878981
-30	0.00897959	0.0145078	-0.00771208	-0.0165922	0.0383509	0.0118602		0.717446	0.980831	0.996835	0.970627	0.970776	0.878981
-20	0.00408163	0.00310881	0.0128535	0.0312699	0.0100171	0.0162297		0.388617	0.888179	0.860759	0.795596	0.928393	0.770701
-10	0.00244898	0.00621762	0.0154242	-0.00319081	0.00315549	0.0181024		0.231675	0.683706	0.658228	0.453489	0.805516	0.477707
0	0.00326531	0.00725389	0.00257069	-0.00829611	0.00570613	0.0237204		0.201782	0.543131	0.556962	0.322216	0.690345	0.292994
10	0.00244898	0.011399	0.00514139	0.0255265	0.0110556	0.0243446		0.194308	0.415335	0.43038	0.377908	0.641485	0.248408
20	0.0122449	0.00207254	0.0179949	0.0204212	0.0199715	0		0.179361	0.421725	0.424051	0.401776	0.634459	0.21465
30	0.00489796	0.00518135	0.033419	0.0389279	0.0385164	0		0.220465	0.479233	0.474684	0.481335	0.660492	0.252866
Fig 2G
inactivation
mCav												mCav + nve a							mCav + nve a2d							mCav + nve b
mV	normalized current
-110	1	1	1	1	1	1	1	1	1	1		1	1	1	1	1	1		1	1	1	1	1	1		1	1	1	1	1	1	1	1	1	1
-100	1.00312	1.00203	1.02119	1.02338	1.00625	1.01722	1.14549	1.19171	0.915133	0.964265		0.947389	1.00941	1.01835	0.984615	0.987411	0.983829		0.992994	1.03994	1.00393	1.00431	1.03182	1.03845		0.921722	0.926273	0.957249	0.997564	1.01273	0.735751	0.801418	0.955134	0.972433	1.03417
-90	0.968847	0.989837	1.02331	1.02728	0.983333	1.02128	1.2302	1.37306	0.762703	0.941418		0.976165	0.976471	1.03976	0.953846	1.02203	1.01836		1.02601	1.00645	1.02208	0.974138	1.01818	1.02868		0.935421	0.919571	0.97026	1.02372	1.00934	0.569948	0.546099	0.955134	0.835504	1.03417
-80	0.956386	1.02033	1.01977	1.01013	0.9875	1.02736	1.26519	1.4456	0.448503	0.913298		1.00273	1.00471	1.03364	0.944231	1.0347	0.969406		1.00414	1.03042	1.01028	1.02586	1.05455	1.05945		0.92955	0.899464	0.949814	0.975147	1.01104	0.544041	0.475177	0.961173	0.728567	0.987851
-70	0.975078	1	1.0113	1.01325	0.964583	1.01925	1.27624	1.43523	0.155452	0.867604		1.03593	1.00941	1.03364	0.965385	1.11644	1.01224		1.03309	1.03841	1.00635	1	1.04545	1.01493		0.894325	0.865952	0.901487	0.909763	0.987267	0.310881	0.184397	0.934426	0.679794	0.851936
-60	1.00312	0.96748	0.996469	1	0.947917	1.00203	1.26703	1.37306	0.0939302	0.810193		1.01601	0.997647	1.02752	0.942308	1.11015	0.985577		1.04417	0.998466	1.07711	0.935345	1.04545	1.07194		0.868885	0.77748	0.711896	0.683724	0.928693	0	0	0.910267	0.647077	0.689446
-50	1.00312	0.973577	0.972458	0.987529	0.902083	0.964539	1.22284	1.25907	0.0848668	0.738723		1.01158	0.990588	1.03976	0.913462	1.04799	1.01442		1.07405	1.03042	1.04959	0.948276	1.00455	1.07514		0.741683	0.612601	0.366171	0.321313	0.697793	-0.0414508	-0.0638298	0.770492	0.558619	0.518603
-40	0.937695	0.95122	0.933616	0.947779	0.8625	0.919959	1.17311	1.15026	0.0955781	0.688928		0.942962	0.936471	0.981651	0.919231	1.00315	1.03059		1.0719	1.05438	1.02601	0.948276	1.00909	1.06757		0.547945	0.327078	0.126394	0.123294	0.312394	-0.0207254	-0.035461	0.485764	0.372917	0.343204
-30	0.604361	0.943089	0.668079	0.685892	0.725	0.85613	1.08471	0.92228	0.0741555	0.574692		0.920827	0.931765	0.944954	0.896154	1.06294	0.956731		1.04917	1.01844	0.974904	0.900862	1.00455	1.09787		0.311155	0.131367	0.0594795	0.0504386	0.0636672	-0.00518135	-0.0070922	0.188956	0.149046	0.154138
-20	0.208723	0.804878	0.230932	0.219797	0.404167	0.630193	0.685083	0.42487	0.0241692	0.174575		0.763666	0.734118	0.785933	0.826923	0.842644	0.881119		1.01722	0.930571	0.900214	0.797414	0.854545	1.02411		0.109589	0.0442359	0.0223048	0.0298896	0.00848896	-0.0259067	-0.0425532	0.0664366	0.0212057	0.028853
-10	0.0654206	0.49187	0.0741525	0.0826189	0.233333	0.12462	0.246777	0.170984	0.00988739	-0.02753		0.506897	0.425882	0.486239	0.805769	0.519276	0.635664		0.883638	0.850693	0.817661	0.607759	0.6	0.911638		0.0450098	0.0308311	0.0185874	0.0242853	-0.00424448	-0.0310881	-0.0283688	0.0362381	0.00363526	-0.00152
0	0.0404984	0.325203	0.0550848	0.0553391	0.160417	0	0	0.0518135	0.0065916	-0.04862		0.356378	0.284706	0.363914	0.740385	0.402046	0.399388		0.762489	0.698926	0.723316	0.487069	0.531818	0.806744		0.0215264	0.0174263	0.0167286	0.0298896	0.00339559	0.00518135	0.035461	0.0327869	0.00090882	0
10	0.0498442	0.300813	0.0607345	0.0537802	0.145833	0.0324215	-0.0423573	0	0.00741554	-0.03281		0.296612	0.228235	0.266055	0.509615	0.354839	0.327185		0.772138	0.690939	0.621108	0.469828	0.509091	0.743072		0.0273973	0.0174263	0.0167286	0.0373619	0.00169779	0.00518135	0	0.0379638	0.00757346	-0.00683
20	0.0654206	0.349594	0.0812147	0.0802806	0.133333	0.103343	-0.0165746	0.0207254	0.0142818	-0.00293		0.287758	0.242353	0.278287	0.361538	0.348544	0.425262		0.734614	0.635025	0.636833	0.452586	0.472727	0.770019		0.037182	0.0321716	0.0297398	0.0410981	0.00509338	0	0.0141844	0.0543572	0.0181763	0.003037
30	0.11215	0.388211	0.120763	0.120811	0.175	0.184397	0.0276243	0.0414508	0.0252678	0.033978		0.343096	0.296471	0.324159	0.315385	0.331235	0.394231		0.746836	0.631031	0.660419	0.482759	0.486364	0.787917		0.0410959	0.0442359	0.0297398	0.0298896	0.016129	0.0207254	0.0212766	0.00643658	0.00357467	0.022779

## Sheet: Fig 2 - supp 1
Fig 2 - S1A
normalized expression (tpm)
subunit	other cells						nematocyte-enriched								other cells						nematocyte-enriched
a1a	46.9953	31.2166	24.027	25.4132	46.0679	19.9636	40.5876	45.4982	62.828	39.6394	89.3934	42.0446		a2d1	25.0903	20.9312	17.0147	12.6803	25.4966	9.60347	24.2178	19.529	33.8393	17.3586	45.5947	22.6188
a1h1	21.4658	14.7355	7.78957	14.9839	27.6757	12.0779	16.3755	18.5199	23.9396	12.2238	37.8196	11.0908		a2d2	26.5635	20.567	24.4936	47.8953	29.4362	31.0031	12.9236	7.50597	14.1532	6.10412	10.7566	9.35024
a1h2	8.24691	5.36345	2.68278	5.13469	9.58676	3.4791	1.59988	1.38821	0.644379	1.67394	1.2349	0.684525		a2d3	0	0	0	5.61172e-10	0	1.39116	2.44266e-09	1.13427e-08	1.33032	1.30193	0	1.57454
Fig 2 - S1D
activation
nCav							nCav + mB							mCav										mCav + nve a2d1
mV	normalized current
-100	0.00864569	0.0102056	0.00522822	0.00496066	-0.00082746		0	0.00398933	0	-0.0114037	-0.00588668	0.0161315		0.0190334	-0.0427372	0.00227717	0.00162157	0.0207491						-0.00036367	0.00468772	0.00660879	-0.0206594	-0.0064472	-0.00124552			-0.0283019	0.0235795	0.0178165	-0.0118685
-90	0.00552869	0.0100793	0.0201108	0.00470741	0.00176032		-0.0271666	0.00638561	0.00139101	-0.00945695	0.00078331	-0.0140903		0.0115965	-0.0534542	-0.0104807	-0.0002884	0.0197516						0.010564	0.00371822	0.00903384	0.00948196	0.0206397	-0.0213417			-0.0569081	0.0283564	0.0213697	-0.0337735
-80	0.00526048	0.00361238	0.00119942	0.00631066	-0.00322297		0.0183922	0.01369	-0.0225895	-0.00723404	-0.00334932	-0.00671615		0.0450187	-0.0206458	-0.0249283	0.00958359	0.0159446	-0.00297	0.001984	0.004044	-0.00121938		-0.00475777	-0.00737876	-0.0112431	-0.0102058	0.0117998	0.0114854	0.00936		-0.0214704	0.0169205	0.0230009	-0.0452541	-0.00482	-0.00568
-70	0.005659	0.00585911	0	0.00340184	0.00317004		-0.0016515	0.0147513	-0.0196997	-0.0171298	0.0098929	0.00543064		-0.013367	-0.047474	0.0184112	0.00233179	0.0172623	-0.00142	0.009892	0.012434	-0.000653397		0.0127413	0.00656457	0.00719531	-0.0110492	0.00476793	-0.00310865	0.002808		0.0153739	0.0219289	0.0204551	0.0316954	-0.00049	0.010049
-60	0.00229607	0.00956642	0.00703106	0.0029521	0.00497404		0.00895141	0.00666286	-0.0126293	-0.00842975	-0.00679912	0.00589086		0.0126627	-0.0557717	-0.00693582	0.00072221	0.0117609	0.00116	0	-0.01599	0.00394157		-0.00409377	0.00829724	0.0116778	-0.0281042	0.00516859	-0.00508306	0.030032		0.0788679	0.0168837	0.0213284	0.0317159	-0.00356	0.001449
-50	0.00416846	0.0069968	-0.0138499	0.0064509	-0.00523045		0.0136817	0.0130934	0.0200244	-0.00183784	0.0158364	0		0.0197193	-0.0679486	-0.00965446	0.00433658	0.0198189	-0.00169	0.006721	-0.00088	0.00137295		-0.006103	-0.00035979	-0.00372532	0.0352992	-0.0169283	0.00558634	-0.02393		0.0225595	0.0130529	0.0149164	0.0230838	-0.00267	0.018803
-40	0.00274628	0.00645762	0.0135934	0.00177729	-0.00092246		-0.0344313	0.0192213	0.00674897	0.0020198	0.0104068	-0.059109		0.0368419	-0.060265	0.0058468	-0.00086811	0.0105202	0.006532	-0.00345	0.001964	0.00865706		0.0274416	0.0190002	0.0200056	0	0.0165674	-0.0227342	0.044778		0.0543576	0.0180337	0.0106429	-0.00635386	0.00363	0.072698
-30	0.0274031	0.00038972	0.0189675	0.0286991	0.00915807		-0.00478749	0.0124723	0.182222	-0.00672527	-0.0115023	-0.0473947		0.105834	0.0261734	0.0154217	0.0212444	0.0300847	0.003643	0.025267	-0.00333	0.0104432		-0.00767771	0.0137427	0.0108098	0.0715244	0.011518	0.0232189	0.057809		-0.0273088	0.0134369	0.0225851	0.134288	0.025594	0.203787
-20	0.110454	0.118466	0.0837066	0.108301	0.0272286		0.164502	0.0321167	0.752787	0.0428148	0.062849	0.00594121		0.0378318	0.156825	0.0527754	0.135986	0.120127	0.031771	0.11423	0.025463	0.0372743		0.0284815	0.0199631	0.0210837	-0.0815983	0.0337376	0.034436	0.108945		0.0244173	0.0304569	0.0454697	-0.00398122	0.020367	0.152632
-10	0.558944	0.488073	0.417688	0.603206	0.330465		0.512539	0.225224	0.961133	0.330423	0.169978	0.0408895		0.18189	0.782744	0.504774	0.687546	0.670565	0.340376	0.485787	0.128533	1		0.0965711	0.179871	0.198062	0.0876693	0.151537	0.268236	0.254004		0.332075	0.193284	0.195818	0.141304	-0.00121	0.073236
0	1	0.938231	0.870947	1	1		0.971334	0.798256	1	0.869508	1	0.893039		0.714065	1	1	1	1	0.996108	0.956773	0.615132	0.942177		0.657104	0.649679	0.682423	0.445652	0.601163	0.778108	0.723918		0.750363	0.743424	0.6731	0.239885	0.07866	0.171991
10	0.980422	1	1	0.994244	0.954135		1	1		1	0.930831	1		1	0.942036	0.904337	0.950637	0.967951	1	1	0.964792	0.802416		0.88116	1	1	1	1	1	0.959665		1	1	1	0.800848	0.270199	0.599963
20		0.858981	0.992317	0.873163															0.893966		1			1	0.961072	0.924876		0.977792	0.946434	1			0.930022	0.992803	1	0.776479	1
																																			1	1
Fig 2 - S1E																																				0.842841
activation rise time (ms)							R200 (ms)
nematostella	mammalian	NVE + mB	mam + NVEB	mam + NVEa	mam + NVEa2d		nematostella	mammalian	NVE + mB	mam + NVEB	mam + NVEa	mam + NVEa2d
5.8	4.1	5.9	5.5	5.5	8		0.03	0.78	0.89	0.23	0.95	0.95
4	5.5	5	5.5	4	7		0.02	0.72	0.96	0.23	0.88	0.85
5.5	9.5	6	4.1	4.6	6.6		0.02	0.98	0.98	0.24	0.84	0.92
5.9	10	8.2	4.6	8	12		0.03	0.86	0.99	0.15	0.82	0.8
4.6	12.4	4	4.1	4.6	8.6		0.12	0.92	0.95	0.17	0.789082	0.76
	11.8	7.6	5.5	5.2	9.6			0.928379	0.85	0.1	0.774621	0.84
	5.9		4		6			0.885831		0.19		0.627222
	15.2		6.7					0.978599		0.277623
	6.6		5					0.945292		0.416242
	4.6		5.9					0.915648		0.256085
			4.3							0.161852
			5.1							0.520108
			8.4							0.426632
			7.2							0.313143
Fig 2 - S1F
normalized current
sweep	nCav						mCav
1	1	1	1	1	1		1	1	1	1	1	1
2	0.623722	0.676895	0.576944	0.495992	0.850947		0.939869	0.887629	0.978355	0.973077	0.981013	0.984733
3	0.433538	0.49639	0.345586	0.435812	0.751745		0.924836	0.775258	0.967532	0.992308	0.968354	0.942748
4	0.351738	0.382671	0.246432	0.322974	0.66002		0.914098	0.844821	0.952381	1.00385	0.927215	0.938931
5	0.263804	0.31769	0.19355	0.187569	0.588235		0.903361	0.791311	0.974026	0.973077	0.933544	0.965649
6	0.226994	0.261733	0.134058	0.180047	0.532403		0.87759	0.748503	0.9329	0.965385	0.911392	0.935115
7	0.206544	0.231047	0.18694	0.165002	0.492522		0.873295	0.796662	0.928571	0.973077	0.924051	0.912214
8	0.179959	0.216607	0.213381	0.210137	0.453639		0.853967	0.791311	0.941558	0.953846	0.901899	0.935115
9	0.161554	0.194946	0.134058	0.232704	0.42672		0.879738	0.78596	0.930736	0.942308	0.924051	0.938931
10	0.157464	0.193141	0.160499	0.195092	0.403789		0.85182	0.775258	0.91342	0.969231	0.886076	0.923664
11	0.137014	0.166065	0.134058	0.180047	0.383848		0.871147	0.753854	0.893939	0.938462	0.901899	0.900763
12	0.155419	0.158845	0.140668	0.142434	0.367398		0.853967	0.716398	0.898268	0.942308	0.857595	0.90458
13	0.141104	0.173285	0.167109	0.172524	0.347458		0.858262	0.689643	0.900433	0.946154	0.867089	0.912214
14	0.145194	0.16787	0.134058	0.119867	0.334995		0.862557	0.737801	0.874459	0.938462	0.876582	0.916031
15	0.120654	0.149819	0.147279	0.0972992	0.326022		0.836787	0.732451	0.891775	0.923077	0.860759	0.889313
16	0.118609	0.149819	0.101007	0.104822	0.317547		0.86041	0.732451	0.874459	0.942308	0.870253	0.900763
17	0.128834	0.151625	0.134058	0.172524	0.297109		0.856115	0.775258	0.878788	0.919231	0.844937	0.912214
18	0.132924	0.162455	0.074566	0.202614	0.291625		0.853967	0.775258	0.859307	0.915385	0.886076	0.896947
19	0.120654	0.146209	0.101007	0.119867	0.280658		0.843229	0.748504	0.859307	0.934615	0.857595	0.900763
20	0.130879	0.15343	0.0613455	0.172524	0.272183		0.841082	0.780609	0.859307	0.896154	0.844937	0.900763
21	0.122699	0.162455	0.101007	0.134912	0.268195		0.832492	0.753854	0.874459	0.923077	0.863924	0.896947
22	0.139059	0.146209	0.114227	0.157479	0.254237		0.862557	0.764556	0.854978	0.95	0.860759	0.885496
23	0.108384	0.144404	0.101007	0.180047	0.258724		0.845377	0.700345	0.829004	0.888462	0.829114	0.89313
24	0.124744	0.16065	0.0943967	0.0972992	0.252742		0.845377	0.743153	0.848485	0.896154	0.844937	0.874046
25	0.118609	0.138989	0.120838	0.119867	0.245763		0.843229	0.748504	0.829004	0.903846	0.85443	0.896947
26	0.134969	0.142599	0.127448	0.119867	0.237288		0.828197	0.759205	0.82684	0.907692	0.851266	0.900763
27	0.122699	0.138989	0.114227	0.104822	0.240279		0.834639	0.721749	0.84632	0.9	0.832278	0.89313
28	0.118609	0.15704	0.0943967	0.225182	0.234796		0.845377	0.705696	0.816017	0.896154	0.838608	0.90458
29	0.116564	0.142599	0.114227	0.165002	0.231805		0.830344	0.711047	0.824675	0.884615	0.832278	0.858779
30	0.120654	0.16065	0.0943967	0.172524	0.228315		0.823901	0.732451	0.811688	0.892308	0.835443	0.862595
31	0.106339	0.137184	0.18033	0.149957	0.224826		0.823901	0.78596	0.800866	0.926923	0.829114	0.881679
32	0.104294	0.144404	0.120838	0.225182	0.222333		0.841082	0.721749	0.809524	0.926923	0.835443	0.866412
33	0.114519	0.146209	0.107617	0.180047	0.212363		0.828197	0.694994	0.811688	0.911538	0.806962	0.862595
34	0.132924	0.137184	0.134058	0.195092	0.214357		0.836787	0.753854	0.818182	0.919231	0.832278	0.854962
35	0.108384	0.144404	0.0943967	0.180047	0.209372		0.826049	0.705696	0.818182	0.915385	0.860759	0.854962
36	0.112474	0.126354	0.127448	0.149957	0.211864		0.823901	0.721749	0.805195	0.907692	0.832278	0.862595
37	0.112474	0.129964	0.114227	0.134912	0.208375		0.836787	0.716398	0.790043	0.911538	0.829114	0.881679
38	0.0961145	0.126354	0.114227	0.119867	0.207378		0.823901	0.737802	0.796537	0.896154	0.813291	0.881679
39	0.118609	0.135379	0.134058	0.157479	0.201894		0.841082	0.711047	0.800866	0.930769	0.810127	0.885496
40	0.0920245	0.129964	0.114227	0.157479	0.200897		0.823901	0.689643	0.78355	0.915385	0.806962	0.866412
41	0.0940695	0.142599	0.120838	0.225182	0.195414		0.828197	0.67359	0.807359	0.876923	0.803797	0.847328
42	0.106339	0.144404	0.120838	0.210137	0.202393		0.830344	0.721749	0.796537	0.911538	0.810127	0.847328
43	0.114519	0.120939	0.120838	0.225182	0.208375		0.843229	0.694994	0.792208	0.911538	0.81962	0.858779
44	0.116564	0.117329	0.134058	0.180047	0.195414		0.836787	0.716398	0.796537	0.919231	0.797468	0.847328
45	0.110429	0.124549	0.18694	0.172524	0.195912		0.821754	0.678941	0.766234	0.896154	0.806962	0.874046
46	0.110429	0.117329	0.147279	0.165002	0.196909		0.826049	0.678941	0.78355	0.880769	0.800633	0.866412
47	0.104294	0.129964	0.0811762	0.165002	0.190927		0.830344	0.689643	0.78355	0.892308	0.810127	0.839695
48	0.114519	0.120939	0.0943967	0.187569	0.189432		0.836787	0.705696	0.768398	0.919231	0.778481	0.851145
49	0.114519	0.115523	0.134058	0.202614	0.188435		0.819606	0.721749	0.764069	0.884615	0.825949	0.870229
50	0.120654	0.119134	0.101007	0.119867	0.188435		0.821754	0.711047	0.764069	0.915385	0.78481	0.835878
51	0.0920245	0.117329	0.140668	0.217659	0.189432		0.838934	0.67359	0.768398	0.907692	0.797468	0.854962
52	0.132924	0.138989	0.0877865	0.149957	0.191924		0.821754	0.684292	0.766234	0.896154	0.803797	0.847328
53	0.122699	0.122744	0.134058	0.180047	0.19342		0.806721	0.716398	0.75974	0.880769	0.787975	0.851145
54	0.134969	0.113718	0.0613455	0.180047	0.19342		0.826049	0.678941	0.772727	0.896154	0.781646	0.862595
55	0.120654	0.120939	0.0811762	0.149957	0.188933		0.838934	0.646835	0.761905	0.869231	0.810127	0.870229
56	0.0879346	0.126354	0.107617	0.134912	0.190927		0.811016	0.684291	0.746753	0.892308	0.781646	0.824427
57	0.110429	0.135379	0.107617	0.172524	0.187936		0.821754	0.73245	0.766234	0.9	0.813291	0.828244
58	0.0961145	0.120939	0.167109	0.0972991	0.186441		0.804574	0.684291	0.744589	0.923077	0.791139	0.847328
59	0.110429	0.129964	0.0943967	0.142434	0.18345		0.811016	0.689642	0.74026	0.892308	0.778481	0.832061
60	0.108384	0.124549	0.134058	0.142434	0.186939		0.802426	0.684291	0.744589	0.873077	0.775316	0.816794
61	0.102249	0.128159	0.134058	0.172524	0.184447		0.832492	0.684291	0.746753	0.865385	0.794304	0.862595
62	0.112474	0.117329	0.0943967	0.202614	0.183948		0.815311	0.657537	0.744589	0.892308	0.778481	0.820611
63	0.116564	0.102888	0.0943967	0.165002	0.180459		0.828197	0.668239	0.744589	0.853846	0.797468	0.851145
64	0.104294	0.101083	0.127448	0.187569	0.181456		0.819606	0.711046	0.74026	0.876923	0.78481	0.828244
65	0.110429	0.120939	0.114227	0.119867	0.175972		0.811016	0.646835	0.725108	0.85	0.781646	0.812977
66	0.120654	0.120939	0.0613455	0.202614	0.175972		0.813164	0.711046	0.722944	0.865385	0.775316	0.858779
67	0.108384	0.124549	0.0547352	0.127389	0.182453		0.821754	0.657537	0.746753	0.85	0.781646	0.858779
68	0.128834	0.108303	0.0811762	0.142434	0.176969		0.832492	0.700344	0.718615	0.873077	0.775316	0.828244
69	0.110429	0.133574	0.0613455	0.187569	0.175474		0.826049	0.684291	0.714286	0.861538	0.762658	0.835878
70	0.118609	0.117329	0.0679557	0.134912	0.175474		0.811016	0.684291	0.725108	0.819231	0.759494	0.847328
71	0.108384	0.111913	0.0943967	0.149957	0.176471		0.821754	0.705695	0.718615	0.846154	0.768987	0.854962
72	0.104294	0.115523	0.0811762	0.104822	0.177966		0.819606	0.700344	0.718615	0.846154	0.772152	0.824427
73	0.114519	0.119134	0.0613455	0.0972991	0.173978		0.813164	0.662888	0.705628	0.853846	0.787975	0.858779
74	0.108384	0.117329	0.0547352	0.119867	0.174975		0.834639	0.689642	0.729437	0.85	0.778481	0.870229
75	0.120654	0.102888	0.127448	0.134912	0.171984		0.826049	0.721748	0.703463	0.869231	0.768987	0.843511
76	0.114519	0.117329	0.107617	0.134912	0.176471		0.795983	0.705695	0.69697	0.846154	0.791139	0.824427
77	0.116564	0.106498	0.0415147	0.149957	0.172981		0.804574	0.662888	0.714286	0.842308	0.797468	0.828244
78	0.116564	0.108303	0.0745659	0.0747316	0.176969		0.808869	0.689642	0.720779	0.838462	0.781646	0.839695
79	0.124744	0.108303	0.114227	0.119867	0.166002		0.828197	0.657537	0.703463	0.846154	0.781646	0.843511
80	0.100205	0.110108	0.0613455	0.119867	0.17348		0.804574	0.657537	0.709957	0.830769	0.78481	0.839695
81	0.106339	0.110108	0.048125	0.165002	0.177966		0.802426	0.662888	0.694805	0.842308	0.791139	0.820611
82	0.100205	0.102888	0.0745659	0.119867	0.167498		0.830344	0.694993	0.686147	0.830769	0.787975	0.820611
83	0.100205	0.115523	0.0613455	0.149957	0.172483		0.819606	0.727099	0.701299	0.842308	0.78481	0.80916
84	0.104294	0.120939	0.0679557	0.180047	0.173978		0.830344	0.711046	0.714286	0.85	0.806962	0.80916
85	0.104294	0.115523	0.0745659	0.127389	0.174477		0.808869	0.652186	0.688312	0.861538	0.775316	0.824427
86	0.102249	0.117329	0.0877864	0.127389	0.174975		0.826049	0.652186	0.679654	0.811538	0.753165	0.835878
87	0.100205	0.102888	0.147279	0.165002	0.174477		0.838934	0.641484	0.692641	0.823077	0.775316	0.805344
88	0.120654	0.124549	0.134058	0.127389	0.17348		0.826049	0.614729	0.699134	0.830769	0.794304	0.828244
89	0.0899796	0.110108	0.0547352	0.119867	0.169492		0.830344	0.652186	0.670996	0.842308	0.756329	0.80916
90	0.108384	0.120939	0.048125	0.0747316	0.177468		0.817459	0.67359	0.694805	0.834615	0.787975	0.858779
91	0.0858896	0.104693	0.107617	0.0972991	0.174477		0.815311	0.652186	0.679654	0.85	0.781646	0.835878
92	0.116564	0.113718	0.114227	0.127389	0.170987		0.826049	0.614729	0.666667	0.838462	0.781646	0.80916
93	0.114519	0.0938628	0.0943967	0.149957	0.175474		0.847524	0.700344	0.679654	0.830769	0.78481	0.790076
94	0.102249	0.0956679	0.0745659	0.172524	0.172981		0.808869	0.684291	0.675325	0.85	0.743671	0.80916
95	0.0899796	0.0938628	0.0943967	0.127389	0.167996		0.806721	0.67894	0.686147	0.842308	0.762658	0.782443
96	0.104294	0.119134	0.0613455	0.0822541	0.17348		0.798131	0.694993	0.67316	0.85	0.768987	0.812977
97	0.104294	0.119134	0.0547352	0.127389	0.166999		0.802426	0.598676	0.651515	0.842308	0.775316	0.812977
98	0.112474	0.119134	0.107617	0.134912	0.1665		0.830344	0.657537	0.681818	0.830769	0.775316	0.816794
99	0.118609	0.119134	0.0547352	0.119867	0.169492		0.828197	0.625431	0.666667	0.819231	0.78481	0.839695
100	0.0981595	0.110108	0.0943967	0.165002	0.172981		0.795983	0.604027	0.666667	0.834615	0.772152	0.816794
101	0.106339	0.113718	0.0547352	0.142434	0.170489		0.834639	0.668239	0.655844	0.853846	0.800633	0.820611
102	0.100205	0.119134	0.107617	0.0972991	0.170987		0.798131	0.641484	0.647186	0.857692	0.768987	0.79771
103	0.112474	0.101083	0.107617	0.119867	0.170489		0.813164	0.668239	0.662338	0.861538	0.75	0.790076
104	0.0961145	0.117329	0.134058	0.0822541	0.172981		0.806721	0.550517	0.647186	0.826923	0.772152	0.812977
105	0.0981595	0.106498	0.114227	0.0747316	0.170489		0.821754	0.604027	0.662338	0.826923	0.762658	0.80916
106	0.104294	0.124549	0.0745659	0.0822541	0.174975		0.821754	0.67359	0.638528	0.826923		0.79771
107	0.108384	0.111913	0.114227	0.134912	0.172483		0.828197	0.62008	0.651515	0.819231		0.820611
108	0.0981595	0.122744	0.114227	0.0822541	0.168495		0.819606	0.539815	0.640693	0.811538		0.824427
109	0.0981595	0.106498	0.107617	0.134912	0.167498		0.830344	0.604027	0.647186	0.815385		0.80916
110	0.0981595	0.106498	0.0877864	0.149957	0.170987		0.815311	0.598676	0.634199	0.823077		0.778626
111	0.106339	0.106498	0.0811762	0.172524	0.1665		0.828197	0.604027	0.632035	0.811538		0.820611
112	0.0879346	0.110108	0.101007	0.172524	0.1665		0.830344	0.625431	0.642857	0.823077		0.80916
113	0.0940695	0.101083	0.134058	0.180047	0.163509		0.832492	0.577272	0.640693	0.803846		0.790076
114	0.108384	0.0956679	0.0943967	0.180047	0.168993		0.800279	0.604027	0.645022	0.823077		0.782443
115	0.0899796	0.104693	0.134058	0.127389	0.16999		0.821754	0.646835	0.62987	0.815385		0.816794
116	0.100205	0.101083	0.134058	0.112344	0.166002		0.838934	0.668239	0.634199	0.815385		0.816794
117	0.108384	0.102888	0.167109	0.134912	0.172981		0.800279	0.598676	0.649351	0.8		0.80916
118	0.100205	0.101083	0.0613455	0.104822	0.172483		0.798131	0.593325	0.634199	0.819231		0.820611
119	0.102249	0.0974729	0.101007	0.127389	0.167498		0.821754	0.609378	0.634199	0.776923		0.770992
120	0.116564	0.115523	0.0877864	0.149957	0.169492		0.832492	0.598676	0.627706	0.830769		0.770992
Fig 2 - S1G
inactivation in Ba2+
mV	normalized current
-110	1	1	1	1	1	1
-100	1.00555	0.978621	0.924944	0.928222	0.911207	0.94443
-90	1.0111	0.977173	0.926476	0.883508	0.856844	0.9288
-80	0.970874	0.943877	0.949452	0.862328	0.826038	0.940956
-70	0.778086	0.734857	0.914222	0.796434	0.789796	0.899279
-60	0.38835	0.319714	0.7733	0.731716	0.675634	0.696099
-50	0.0929265	0.104232	0.477671	0.498732	0.385697	0.343574
-40	0.00970874	0.0260579	0.142216	0.224565	0.06858	0.124765
-30	0.00416089	0.0159243	0.033462	0.090423	-0.06189	0.063985
-20	0.00970874	0.0115813	0.00589	0.041002	-0.08907	0.0362
-10	0.00693481	0.0115813	0.002827	0.031588	-0.10719	0.032726
0	-0.00277393	0.00289533	0.002827	0.039825	-0.11263	0.032726
10	0.00970874	0.0115813	0.001295	0.035119	-0.10719	0.048356
20	0.0235784	0.017372	0.002827	0.059829	-0.10176	0.072668
30	0.0208044	0.013029	0.010485	0.052769	-0.11263	0.095243
Fig 2 - S1H
normalized current
s	nCaV						mCav
5	1	1	1	1	1		1	1	1	1	1	1	1
10	0.956316	1.0205	0.956316	1.00705	1.03331		0.997369	0.982267	0.980647	0.997256	1.0063	0.984973	0.99691
15	0.962844	1	0.962844	1.0188	1.03531		0.988162	0.944968	0.991706	1.01006	1.01681	0.983607	0.99794
20	0.936733	0.963103	0.936733	1.02115	1.04597		0.988819	0.977987	1.00415	0.999085	1.0042	0.989071	0.991761
25	0.979163	1.0164	0.979163	1.01528	1.05396		0.981914	1.00978	1.00276	1.00366	0.962185	1.01639	1.00206
30	0.988955	1.0287	0.988955	1.0094	1.05263		0.975666	0.99572	0.991706	1.01006	1	1.00273	1.00515
35	0.943261	1.10659	0.943261	1.01528	1.04997		0.973364	0.988382	1.01244	1	0.983193	0.986339	1.01133
40	0.9759	1.0246	0.9759	1.00588	1.0453		0.968431	1.00367	0.997235	1.00549	0.966387	0.987705	0.989701
45	0.972636	1.11069	0.972636	0.998825	1.04664		0.967116	0.985936	0.991706	0.995427	0.976891	0.995902	0.994851
50	1.00854	1.11069	1.00854	0.990599	1.04863		0.961197	0.968204	0.979265	0.994513	0.981092	0.993169	0.995881
55	0.992219	1.0656	0.992219	0.981199	1.05463		0.956593	0.94986	0.965441	0.996342	0.989496	0.976776	0.994851
60	0.982427	0.942605	0.982427	0.972973	1.0473		0.947057	0.942522	0.959912	1	0.983193	0.98224	0.991761
65	1.00854	1.06969	1.00854	0.971798	1.06396		0.945084	0.932738	0.973735	0.989025	0.976891	0.972678	1.00412
70	0.992219	1.08609	0.992219	0.964747	1.03797		0.941795	0.928458	0.955765	0.998171	0.978992	0.974044	0.993821
75	1.02812	1.07789	1.02812	0.961222	1.05263		0.949359	0.95842	0.962677	0.993598	0.981092	0.964481	0.989701
80	1.03139	1.13119	1.03139	0.969448	1.05063		0.944097	0.943133	0.955765	0.980794	0.972689	0.95765	0.989701
85	0.998747	1.0205	0.998747	0.971798	1.04464		0.948701	0.920509	0.955765	0.983538	0.97479	0.964481	0.992791
90	1.00854	0.979502	1.00854	0.963572	1.04797		0.947715	0.905222	0.950235	0.981709	1.0042	0.965847	0.995881
95	0.995483	1.20088	0.995483	0.971798	1.05063		0.94344	0.890547	0.959912	0.98994	0.97479	0.95765	0.992791
100	1.02159	1.0574	1.02159	0.957697	1.06063		0.944426	0.894216	0.968206	0.994513	0.976891	0.952186	1.00103
105	1.02486	1.0451	1.02486	0.961222	1.06862		0.940809	0.893604	0.968206	0.97805	1	0.960383	0.989701
110	0.979163	1.20088	0.979163	0.958872	1.05929		0.939494	0.882598	0.980647	0.978965	0.970588	0.953552	0.980433
115	1.00201	1.07789	1.00201	0.943596	1.07062		0.951332	0.874649	0.969588	0.971648	0.951681	0.95765	0.985582
120	1.00201	1.08609	1.00201	0.944771	1.07995		0.942124	0.904611	0.969588	0.979879	0.955882	0.943989	0.982492
125	0.985691	1.0328	0.985691	0.942421	1.08195		0.936534	0.923566	0.940559	0.974392	0.976891	0.95082	0.986612
130	0.9759	1.0574	0.9759	0.943596	1.08261		0.935876	0.917452	0.937794	0.980794	0.970588	0.960383	0.984552
135	0.985691	1.11069	0.985691	0.921269	1.07861		0.93193	0.927235	0.932265	0.969819	0.972689	0.959016	0.992791
140	1.02486	1.0451	1.02486	0.918919	1.07062		0.932588	0.940688	0.933647	0.954271	0.968487	0.959016	0.987642
145	0.998747	1.18039	0.998747	0.916569	1.06196		0.926669	0.935184	0.9295	0.963417	0.970588	0.948087	0.986612
150	1.01507	1.11069	1.01507	0.916569	1.08195		0.923709	0.933961	0.939177	0.969819	0.953782	0.956284	0.991761
155	1.02159	1.0246	1.02159	0.915394	1.07195		0.931273	0.921732	0.925353	0.964332	0.966387	0.95765	0.985582
160	1.01507	1.0533	1.01507	0.917744	1.07861		0.918448	0.909503	0.906	0.964332	0.951681	0.95082	0.987642
165	1.02812	0.983601	1.02812	0.908343	1.08261		0.922394	0.903388	0.906	0.970734	0.945378	0.93306	0.988671
170	1.0118	1.07379	1.0118	0.901293	1.08328		0.921079	0.889324	0.908765	0.961588	0.936975	0.930328	0.974253
175	1.03465	1.0369	1.03465	0.890717	1.08128		0.928971	0.874037	0.918441	0.95793	0.936975	0.93306	0.984552
180	1.01507	0.946704	1.01507	0.890717	1.07795		0.924038	0.877706	0.896324	0.957015	0.94958	0.928962	0.979403
185	1.00527	1.13119	1.00527	0.894242	1.08594		0.919763	0.865477	0.910147	0.961588	0.947479	0.931694	0.979403
190	1.01507	1.0082	1.01507	0.887192	1.07728		0.916475	0.874037	0.903235	0.942382	0.964286	0.945355	0.973223
195	1.03465	0.971302	1.03465	0.890717	1.07528		0.916804	0.875872	0.889412	0.94604	0.945378	0.930328	0.987642
200	1.01833	1.15169	1.01833	0.889542	1.07728		0.910227	0.883821	0.900471	0.942382	0.945378	0.92623	0.987642
205	1.00201	1.0656	1.00201	0.874266	1.07062		0.911871	0.884432	0.899088	0.94604	0.966387	0.934426	0.990731
210	0.995483	1.12299	0.995483	0.874266	1.07195		0.908583	0.877095	0.886647	0.944211	0.953782	0.93306	0.977343
215	1.02159	0.950804	1.02159	0.86604	1.06262		0.907596	0.87098	0.88803	0.939638	0.945378	0.942623	0.977343
220	1.00201	1.07379	1.00201	0.87074	1.06129		0.913515	0.860585	0.88803	0.932322	0.930672	0.931694	0.990731
225	1.04118	0.983601	1.04118	0.864865	1.07195		0.907267	0.852636	0.896324	0.940553	0.945378	0.922131	0.974253
230	1.01833	1.06969	1.01833	0.86134	1.07129		0.906939	0.84591	0.901853	0.932322	0.94958	0.938525	0.971164
235	1.01507	0.967203	1.01507	0.855464	1.06063		0.900362	0.836738	0.893559	0.927749	0.926471	0.930328	0.969104
240	1.0118	1.0082	1.0118	0.856639	1.05596		0.902664	0.828789	0.883883	0.927749	0.939076	0.923497	0.971164
245	1.0477	0.983601	1.0477	0.854289	1.05663		0.900362	0.82512	0.859	0.922261	0.960084	0.935792	0.976313
250	1.0118	1.0369	1.0118	0.854289	1.04464		0.899046	0.825731	0.875588	0.912201	0.947479	0.92623	0.975283
255	1.02812	0.987701	1.02812	0.853114	1.05596		0.898389	0.856916	0.871441	0.915859	0.932773	0.92623	0.972194
260	1.02486	1.0451	1.02486	0.856639	1.0533		0.901348	0.847744	0.874206	0.915859	0.964286	0.909836	0.975283
265	1.02812	1.0164	1.02812	0.857814	1.05263		0.899375	0.844687	0.845177	0.903055	0.941176	0.909836	0.970134
270	1.01833	0.909807	1.01833	0.849589	1.06529		0.898718	0.869757	0.8355	0.892995	0.943277	0.909836	0.963955
275	1.00527	0.963103	1.00527	0.849589	1.06662		0.903979	0.853859	0.834118	0.886593	0.955882	0.900273	0.970134
280	1.04118	0.942605	1.04118	0.850764	1.05796		0.899704	0.847744	0.798177	0.881105	0.939076	0.892077	0.964985
285	0.992219	0.967203	0.992219	0.853114	1.06129		0.893785	0.874037	0.81753	0.889337	0.953782	0.894809	0.958805
290	1.01833	0.934405	1.01833	0.843713	1.06729		0.890825	0.839795	0.809236	0.896653	0.945378	0.893443	0.962925
295	1.02812	0.897509	1.02812	0.843713	1.06529		0.879645	0.82512	0.802324	0.873789	0.957983	0.89071	0.961895
300	1.03139	0.946704	1.03139	0.843713	1.06196		0.893127	0.84163	0.730442	0.869216	0.934874	0.916667	0.961895
305	0.988955	0.987701	0.988955	0.846063	1.05996		0.884249	0.831235	0.687589	0.857327	0.939076	0.911202	0.959835
310	1.04118	0.963103	1.04118	0.829612	1.05396		0.879974	0.837961	0.758089	0.861899	0.928571	0.903005	0.963955
315	1.03791	0.975402	1.03791	0.834313	1.04197		0.877014	0.831235	0.773295	0.857327	0.920168	0.900273	0.955716
320	0.998747	1.0123	0.998747	0.830787	1.03731		0.873068	0.830012	0.780206		0.943277	0.894809	0.944387
325	1.04118	1.0082	1.04118	0.841363	1.02798		0.868793	0.82084	0.765		0.930672	0.889344	0.953656
330	0.992219	0.971302	0.992219	0.837838	1.02665		0.865834	0.811056	0.774677		0.947479	0.88388	0.951596
335	1.02812	1.0246	1.02812	0.837838	1.01732		0.864189	0.80861	0.763618		0.951681	0.889344	0.952626
340	0.982427	0.983601	0.982427	0.837838	1.01532		0.869122	0.80005	0.759471		0.945378	0.878415	0.954686
345	1.0477	1.0123	1.0477	0.833137	1.006		0.870109	0.789655	0.745648		0.943277	0.878415	0.957775
350	1.0118	1.0492	1.0118	0.823737	1.00533		0.868464	0.776202	0.751177		0.928571	0.871585	0.946447
355	0.992219	1.0533	0.992219	0.820212	1.00333		0.870766		0.74703		0.926471	0.889344	0.943357
360	1.05097	1.0533	1.05097	0.816686	1.00266		0.875699		0.759471		0.936975	0.88388	0.949537
365	1.04118	1.0246	1.04118	0.822562	0.996003		0.871424		0.753942		0.941176	0.871585	0.942327
370	1.03139	1.0451	1.03139	0.826087	0.992005		0.870437		0.733206		0.928571	0.864754	0.940268
375	1.01833	1.0533	1.01833	0.822562	0.982678		0.867478		0.730442		0.915966	0.864754	0.949537
380	1.02812	1.0041	1.02812	0.819036	0.985343		0.858599				0.932773	0.862022	0.937178
385	1.00201	1.0328	1.00201	0.821387	0.978015		0.870437				0.926471	0.864754	0.953656
390	1.03139	1.0574	1.03139	0.827262	0.972019		0.862545				0.92437	0.863388	0.948507
395	1.00854	1.0123	1.00854	0.820212	0.965356		0.84972				0.918067	0.864754	0.937178
400	1.01833	1.07379	1.01833	0.820212	0.955363		0.836238				0.936975	0.848361	0.945417
405	1.04118	0.991801	1.04118	0.819036	0.9507		0.857284				0.922269	0.855191	0.936148
410	1.0118	1.0574	1.0118	0.813161	0.942705		0.846432				0.92437	0.857923	0.940268
415	1.02486	1.041	1.02486	0.822562	0.936043						0.92437	0.84153	0.939238
420	1.02812	1.0492	1.02812	0.817861	0.933378						0.926471	0.836066	0.940268
425	1.03139	1.041	1.03139	0.813161	0.934044						0.943277	0.837432	0.942327
430	1.02486	1	1.02486	0.829612	0.936709						0.915966	0.830601	0.930999
435	1.00527	1.08609	1.00527	0.821387	0.932712						0.932773	0.846995	0.934089
440	1.02812	1.0287	1.02812	0.820212	0.923384						0.951681	0.827869	0.927909
445	1.00854	1.0369	1.00854	0.824912	0.924051						0.951681	0.826503	0.915551
450	0.988955	0.975402	0.988955	0.820212	0.926049						0.941176	0.840164	0.92379
455	1.00201	1.0574	1.00201	0.820212	0.928048						0.951681	0.837432	0.92379
460	1.01507	0.991801	1.01507	0.823737	0.917388						0.953782	0.831967	0.92688
465	1.03465	0.954904	1.03465	0.819036	0.918721						0.94958	0.834699	0.917611
470	1.00527	0.959003	1.00527	0.809636	0.909394						0.947479	0.82377	0.92276
475	0.982427	0.922106	0.982427	0.810811	0.91006						0.941176	0.815574	0.92379
480		0.991801		0.804935	0.906729							0.837432	0.930999
485		0.954904		0.810811	0.911392								0.928939
490		1.0369		0.80611	0.910726								0.942327
495		1.0041		0.811986	0.908728								0.930999
500		1.0123		0.824912	0.900733								0.928939
