# Supplementary material for: A molecular filter for the cnidarian stinging response
Source: eLife. 2020 May 26;9:e57578. doi: 10.7554/eLife.57578 (PMC7250568; doi:10.7554/eLife.57578)
Supplement: Figure 3—source data 1. [file elife-57578-fig3-data1.xlsx]

## Sheet: Fig 3
Fig 3C
Vrest (mV)			width (ms)			frequency (Hz)
nematocyte	neuron		nematocyte	neuron		current injection (pA)	nematocyte				neuron
-68	-69		112	3.1		0	0	0	0		0	0	0	0
-62	-61		204	4		8	0	0	0		0	0	0	0
-59	-73		120	3.4		16	0	1	0		0	0	0	0
-66	-62		520	2.8		24	1	1	1		7	2	4	9
-78			558			32	1	1	1		12	9	8	16
-70			104			40	1	1	1		6	3	7	12
-73			111			48	1	1	1		4	2	3	7
-78			322			56	1	1	1		0
-52						64	1	1	1		0
-61
-57
-53

## Sheet: Fig 3 - supp 1
Fig 3 - S1B
transient																sustained
nematocyte									neuron							nematocyte									neuron
mV	current density (pA/pF)															mV	current density (pA/pF)
-110	0.0881	-1.3997	0.131	-0.9422	-62.2559	-4.27246	-0.61035		5.5487	-0.6425	-1.3563	0.610352	-1.2207	10.9863		-110	-0.3744	1.4796	-2.3475	3.2552	-56.1523	4.88281	4.27246		-0.9924	2.5699	-6.6584	0.6782	2.44141	-6.71387	15.8691
-100	1.0614	0.6659	-0.4012	1.6251	-48.2178	4.27246	-4.88281		-5.5487	1.285	0	1.83106	6.10352	3.66211		-100	-0.3744	-2.2195	3.756	1.4242	-53.1006	6.10352	-3.66211		0.4962	-4.4973	-2.7743	2.0345	-5.49316	-2.44141	2.44141
-90	1.507	0.768	2.1553	0.3196	-42.1143	0.610352	3.66211		-1.1097	0.6425	-0.6782	4.27246	-3.05176	-26.8555		-90	-2.9956	-0.3699	1.4085	0	-47.6074	-5.49316	-0.61035		2.4811	-0.6425	4.9938	2.0345	4.27246	5.49316	6.10352
-80	0.8642	1.3887	1.2149	0.6952	-28.0762	1.2207	-4.27246		-0.5549	1.285	0.6782	1.2207	-7.32422	24.4141		-80	0.3744	0.7398	2.817	2.4414	-34.79	-3.05176	7.93457		0.4962	-6.4248	-1.1097	-2.7127	7.32422	5.49316	0
-70	0.8838	1.8256	3.0067	2.7318	-23.1934	-1.2207	1.83106		3.8841	-14.777	1.3563	-2.44141	1.83106	13.4277		-70	-0.7489	0.5549	2.817	0.6104	-28.0762	7.32422	4.88281		-4.466	-6.4248	-2.2195	1.3563	7.32422	-4.27246	-10.9863
-60	3.0963	2.0599	1.7452	0.1804	-7.32422	0	4.27246		-1.1097	-3.2124	2.7127	13.4277	-0.61035	-3.05176		-60	2.6211	3.1442	3.756	2.6449	-17.7002	4.27246	4.27246		0.4962	1.9274	0.5549	1.3563	4.27246	7.32422	6.10352
-50	-0.4846	3.8272	6.283	1.3592	7.93457	-8.54492	-4.27246		-0.5549	-3.2124	-11.529	-4.88281	0	6.71387		-50	-2.2467	2.4044	8.451	3.4587	-5.49316	0.610352	7.93457		2.9773	6.4248	7.7681	1.3563	3.66211	-8.54492	-1.83105
-40	-16.713	0.6109	-1.1484	0.9939	18.9209	-1.2207	-0.61035		-4.4389	-40.476	-35.943	-15.8691	-38.4521	8.54492		-40	5.2423	-0.9248	4.7326	-1.0173	6.71387	12.8174	13.4277		-6.9471	-0.6425	4.9938	2.0345	3.05176	-29.2969	19.5312
-30	-5.7659	-4.3441	10.667	-1.0385	33.5693	-22.583	-351.6		-356.22	-391.04	-356.83	-267.944	-101.318	1.83106		-30	20.595	0.6836	9.8595	1.3623	15.8691	3.05176	23.8037		-10.421	-7.0672	-13.872	-4.069	-7.93457	-39.6729	21.3623
-20	-159.32	-193.93	-54.685	-72.876	-50.8	-117.798	-300.3		-368.99	-208.16	-325.06	-243.53	-311.279	9.15527		-20	20.22	2.2195	23.006	2.0345	32.959	18.3105	45.166		-4.466	-5.7823	1.6646	-16.276	-15.2588	-19.5313	4.88281
-10	-57.784	-117.68	-103.41	-138.13	64.0869	-53.1006	-97.0459		-143.8	-100.23	-43.403	-10.376	-247.803	3.05176		-10	25.463	10.173	25.823	7.3242	75.6836	54.9316	47.6074		7.4433	8.9947	51.602	14.92	21.9727	48.2178	36.6211
0	-8.0387	-41.066	-14.265	-53.325	108.032	50.0488	-32.3486		5.5487	285.9	107.15	105.591	-155.029	-3.66211		0	40.815	14.426	41.316	12.817	144.043	85.4492	65.918		52.599	85.449	83.23	65.104	66.5283	97.6562	70.1904
10	40.077	4.6068	44.392	-8.1908	211.182	111.694	37.2315		164.24	425.32	151.23	187.988	-26.2451	58.5938		10	48.304	21.085	62.444	16.479	191.65	110.474	80.5664		125.54	154.19	127.06	139.7	131.226	116.577	127.564
20	86.586	43.959	97.071	37.613	274.658	173.34	75.6836		314.61	492.78	216.34	262.451	80.5664	167.236		20	53.172	29.778	66.669	31.331	215.454	136.108	104.37		253.07	240.29	179.78	248.89	180.664	156.86	219.116
30	126.46	87.948	141.71	89.719	377.808	213.623	142.822		432.24	618.7	298.39	301.514	171.509	277.71		30	64.405	36.991	72.303	38.249	162.353	140.381	126.343		377.13	332.8	244.7	347.9	216.065	223.389	300.293
40	206.46	134.01	188.24	135.43	568.237	224.609	208.74		522.68	726.64	383.17	346.069	234.985	404.053		40	73.766	39.026	103.76	37.638	216.675	174.56	153.809		480.84	404.12	317.94	442.84	291.748	288.696	385.742
50	269.8	179.71	217.24	195.47	706.177	269.775	261.231		643.64	824.3	447.59	442.505	313.721	478.516		50	94.361	41.985	109.86	44.963	265.503	199.585	176.392		616.31	487.64	368.43	533.72	385.132	360.718	452.271
60	326.66	204.29	270.72	238.07	842.895	311.89	316.162		717.44	903.32	531.01	572.51	401.001	556.641		60	98.48	46.794	143.67	49.235	265.503	219.116	223.999		737.88	558.31	442.23	607.64	438.843	432.739	530.395
70	388.07	242.9	299.72	282.13	966.187	352.783	339.966		806.77	993.27	590.68	632.324	488.892	619.507		70	115.7	54.007	164.79	66.528	317.993	241.089	236.816		852.01	618.7	480.51	675.46	496.216	485.229	591.431
80	444.85	276.19	359.12	327.38	1069.34	404.663	402.832		871.69	1060.7	661.21	706.177	563.965	678.101		80	126.19	62.515	183.57	71.004	335.693	264.893	283.813		955.23	699.01	539.88	755.48	572.51	553.589	632.324
Fig 3 - S1C
sustained/transient
nematocyte	neuron
0.314434	0.80756
0.226023	0.718163
0.117811	0.685204
0.203638	0.97479
0.313927	0.810717
0.6546	0.981602
0.704545	0.932493
Fig 3 - S1D
inactivation
nematocyte							neuron
mV	normalized current
-110	1	1	1	1	1		1	1	1	1	1
-100	0.656895	0.418876	0.445039	0.295935	0.433404		0.976109	0.99268	0.99268	0.939669	1.00971
-90	0.451683	0.324521	0.32656	0.269974	0.329926		0.948949	0.977235	0.977235	0.946969	1.00408
-80	0.330076	0.281861	0.30116	0.274842	0.254518		0.951849	0.957292	0.957292	0.882097	0.978337
-70	0.347448	0.239142	0.236539	0.262672	0.308058		0.928119	0.924371	0.924371	0.886791	0.959004
-60	0.281216	0.213562	0.213682	0.228598	0.243002		0.914352	0.897696	0.897696	0.894262	0.973156
-50	0.232356	0.183939	0.194021	0.262672	0.201449		0.903217	0.910802	0.910802	0.818782	0.974344
-40	0.248643	0.200903	0.155546	0.255371	0.189564		0.903199	0.912487	0.912487	0.792429	0.957407
-30	0.157438	0.151482	0.133836	0.218052	0.190524		0.87529	0.881204	0.881204	0.779878	0.936502
-20	0.138979	0.132783	0.1167	0.207505	0.140152		0.856728	0.874314	0.874314	0.861946	0.919735
-10	0.129207	0.108881	0.098332	0.228598	0.121317		0.825945	0.848167	0.848167	0.732654	0.887104
0	0.171553	0.126103	0.115798	0.214807	0.136852		0.766056	0.772421	0.772421	0.695464	0.79503
10	0.219327	0.130002	0.127878	0.227787	0.146263		0.631367	0.637727	0.637727	0.631956	0.687112
20	0.160695	0.114462	0.106877	0.218052	0.171825		0.513277	0.527512	0.527512	0.552176	0.620411
30	0.178067	0.164448	0.180946	0.218052	0.132289		0.413537	0.386676	0.386676	0.478116	0.563303
Fig 3 - S1E
control						BAPTA					TEA					0 Ca2+
mV	pA
-110	558.955	674.834	921.97	745.248		105.137	110.02	196.118	137.231		63.9241	91.5527	95.8252	95.8252		163	96	122
-100	364.747	318.712	416.11	346.283		106.358	102.696	202.832	132.256		63.4023	93.3838	100.098	100.098		161	90	100
-90	253.673	232.884	299.962	21.76		108.189	100.254	197.949	135.776		55.5475	93.9941	95.8252	95.8252		152	86	101
-80	184.405	163.184	236.2	173.472		114.903	102.696	190.015	137.842		64.09	91.5527	93.9941	93.9941		154	85	97
-70	191.266	189.519	246.962	143.23		106.968	110.63	201.611	134.18		62.547	93.3838	91.5527	91.5527		160	80	96
-60	157.078	177.687	156.881	123.45		97.2027	103.306	216.87	134.18		54.2898	94.6045	100.708	100.708		150	89	99
-50	130.724	176.149	231.16	125.237		116.124	105.748	202.832	133.101		58.2622	92.1631	95.2148	95.2148		158	87	95
-40	139.501	207.576	147.79	121.742		120.396	132.603	185.742	137.842		60.5917	90.9424	93.3838	93.3838		160	93	100
-30	88.4166	113.503	134.963	128.752		108.189	115.513	204.663	135.776		55.2042	89.7217	92.1631	92.1631		155	90	93
-20	76.3572	103.841	94.9072	125.875		127.11	120.396	216.87	131.88		54.656	91.5527	90.332	90.332		153	92	96
-10	72.1506	92.5152	84.6569	120.481		117.955	111.241	196.728	138.218		53.4671	92.1631	89.7217	89.7217		164	85	94
0	97.3921	88.681	101.241	121.147		130.162	116.124	176.587	134.321		56.7741	89.1113	87.2803	87.2803		153	84	101
10	122.992	112.087	86.4537	124.758		113.072	100.865	188.794	137.983		49.1722	90.332	93.9941	93.9941		162	80	94
20	89.9728	119.592	106.613	123.926		113.682	133.824	183.301	130.894		55.7711	92.1631	90.9424	90.9424		161	82	98
30	100.743	110.519	115.998	121.627		122.838	128.941	183.911	134.697		51.6702	91.5527	89.1113	89.1113		150	81	99
Fig 3 - S1F
normalized expression (tpm)
subunit	other cells						nematocyte-enriched
Kcnt1	49.8113	28.755	17.3368	27.4188	61.5573	17.2479	19.9792	24.173	22.0337	10.4122	17.0599	10.1159
Kcmb4	27.3153	21.984	11.6923	16.4385	39.1551	12.1085	4.67637	14.816	10.4197	4.78739	6.50818	3.52662
Kcnma1	31.2428	15.698	19.4751	7.64383	39.8473	13.1233	2.69863	6.2262	3.6415	4.18584	7.3558	2.78711
Kcmb4	1.21534	0.1955	0.7315	0.73193	0.27877	0.13161	8.50781	8.3896	2.07469	2.18676	2.62664	2.35531
Kcnn2	3.39777	2.8834	3.7187	3.82211	3.48366	2.01422	1.20517	0.8857	0.7458	0.30537	0.77806	0.60488
Fig 3 - S1G
spike width (ms)		Vrest (mV)
1234		-15
1670		-8
1568		2
