# Supplementary material for: A molecular filter for the cnidarian stinging response
Source: eLife. 2020 May 26;9:e57578. doi: 10.7554/eLife.57578 (PMC7250568; doi:10.7554/eLife.57578)
Supplement: Figure 4—source data 1. [file elife-57578-fig4-data1.xlsx]

## Sheet: Fig 4
Fig 4B
amplitude (pA)
control										Gd3+
nematocyte	-32.3	-39	-41.2	-51.8	-123	-177				0	1	0	0	2	0
neuron	0	0	0	0	0	0	0	0
nNompC	-450	-195	-365	-97						0	-2	-12	0
dNompC	-340	-466	-174	-496						-3	0	0	0
Fig 4C
activation (ms)								desensitization (ms)
native	0.8	1.4	2	0.7	1	0.9		4.07	2.41131	2.28259	3.20979	4.26	3.42
nNompC	1	1.04	1.27	1.96				1.3	3.9	2.2	4.5
dNompC	1.1	0.96	1.3	0.88				1.2	3.1	2.2	1.8
Fig 4D
percent increase in basal current
Artemia ext.	NANA	Glutamate	GABA	Glycine	Acetylcholine
7.5	1.81818	2.7972	2.27273	3.27869	385
-10.0457	-1.90476	-2.12766	-3.13901	-1.7341	102.105
-18.1818	-8.51064	2.57732	-2.8125	4.16667	129.688
3.40909	4	-4.28571	8.29493	-2.64151	83.3333
					286.458
Fig 4F
ACh	Nicotine	Tubo.	Mec.	TEA	BAPTA	GDPbS
217.949	57.8616	5.10204	2.04082	6.77966	4.65116	81.8605
120.765	154.237	12.6761	1.88679	13.75	5.94059	250.676
60.4316	70.4082	4.65116	3.22581	7.14286	4.72441	68.7985
128.169	88.7097		0.719424	-9.42029	11.5385	123.899
115.254			6.81818
126.25
149.286
86.2319
222

## Sheet: Fig 4 - supp 1
Fig 4 - S1A
normalized expression (tpm)
	other cells						nematocyte-enriched
NompC	1.95903	0.728648	0.748363	0.854537	1.13902	0.60924	2.85223	1.41031	2.00652	2.91425	3.40625	3.67989
Fig 4 - S1C
Pressure-N(Po)
drosophila							nematostella
mmHg	N(Po)
80	0.752818	0.834521	0.819931	0.67295	0.73059		0.87402	0.680655	0.82184	0.768201	0.683105
70	0.569804	0.740316	0.72406	0.450682	0.64103		0.5899	0.699133	0.52101	0.720195	0.58302
60	0.497247	0.425379	0.658216	0.540386	0.4493		0.5778	0.362306	0.47853	0.530185	0.69582
50	0.19504	0.390641	0.233416	0.375027	0.24051		0.41434	0.35478	0.2901	0.476028	0.365021
40	0.102582	0.078947	0.0278947	0.109575	0.183021		0.034991	0.112091	0.27714	0.35068	0.10528
30	0.034921	0	0	0.059672	0.02093		0.013056	0	0.00999	0.070482	0.134853
20	0	0	0	0.001385	0		0	0	0	0.01541	0
10	0	0	0	0	0		0	0	0	0	0
0	0	0	0	0	0		0	0	0	0	0
i-V
nematostella						drosophila
mV	pA
-100	-14.8	-15	-19	-18		-16	-18	-16	-20
-80	-13	-12	-17	-19		-12	-13	-15	-17
-60	-9	-8	-10	-9.5		-10	-8	-8	-9
-40	-5	-6	-7	-6		-6	-5	-6	-7
-20	-3	-3	-5	-5		-3.5	-4	-4	-5
0	0	0	0	0		0	0	0	0
20	4	5	3	3		4.5	6	4	5
40	4.5	5	5	6		5	6	6	7
60	9	7	8	8.5		7	8	10	8
80	14	15	13	12		15	16	14	16
100	18	20	15	19		20	19	16	21
Fig 4 - S1H
current amplitude
0.5 Ca2+	5 Ca2+	5 Ca2+ + Mec
59	350	15
13.6364	59.0909	6.06061
26.5957	132.979	4.25532
3.22581	132.258	-8.06452
Fig 4 - S1I
normalized expression (tpm)
subunit	other cells						nematocyte-enriched
a7.1	3.64837	1.65291	1.33102	2.60902	0.535754	4.97554	48.2026	63.9091	134.121	26.9068	54.3384	40.2802
a7.2	10.1913	6.51632	2.86652	6.9683	24.4209	6.1653	47.8783	78.8685	135.598	15.1561	28.9137	14.6889
a10	18.3265	17.4231	5.62645	9.09169	15.7296	7.92414	64.4741	61.9243	181.498	15.5805	23.4228	14.0419
a7.3	2.06294	1.56208	0.276372	1.80705	2.78142	1.99387	31.6363	49.706	98.7273	12.9976	25.9325	10.2892
