# Supplementary material for: A molecular filter for the cnidarian stinging response
Source: eLife. 2020 May 26;9:e57578. doi: 10.7554/eLife.57578 (PMC7250568; doi:10.7554/eLife.57578)
Supplement: Figure 5—source data 1. [file elife-57578-fig5-data1.xlsx]

## Sheet: Fig 5
Fig 5B
basal	Ach
mV
-71.2	-88
-66.7	-79.73
-49.2	-59.7
-62.4	-83.9
-72	-84
-53.4	-62
Fig 5C
basal	Ach
mV
3	46
2	32
1	41
3	6
1	2
2	39
Fig 5D
normalized discharge
+prey extract			-prey extract
control	Gd3+	Mec.	control	ACh	ACh + Mec.
1.31822	0.00488136	0.282698	0.0146976	0.838946	0.211951
1.1254	0.00106989	0.248662	0.0333136	1.11946	0.283266
0.976828	0.000568378	0.278853	0.0181079	1.22945	0.621879
1.07543		0.301722	0.00936821	1.16622	0.820437
1.33371		0.119466	0.00162489	1.29901	0.275008
0.651368		0.196612		1.11405	0.183419
1.03235		0.363033		0.665871	0.00445341
0.486699		0.270962		0.781205	0.26021
		0.335704		0.866937	0.360907
		0.216846		0.357657	0.00847886
		0.220283		1.0075	0.254379
		0.412301		0.213904	0.0018723
		0.644641		0.664688
		0.568893		0.561751

## Sheet: Fig 5 - supp 3
Fig 5 - S3B
mV
<-60mV			>-60mV
basal	ACh		basal	ACh
3	46		3	6
2	32		1	2
1	41
2	39
Fig 5 - S3C
normalized discharge
Control	Wash Gd3+	Wash Mec.	Wash Cd2+
1.31822	0.396982	1.16102	1.18273
1.1254	0.546806	0.398674	1.35074
0.976828	0.516321	0.412696	0.866576
1.07543	0.403401	1.42008	1.06091
1.33371	1.31517	0.651903	1.40154
0.651368	0.758892	1.15177	0.733916
1.03235	1.13908	1.31701	0.989747
0.486699		1.15448	1.66398
		0.44385
		1.14782
		0.727216
		0.459931
		0.554804
		0.670091
Fig 5 - S3D
normalized expression (tpm)
subunit	other cells						nematocyte-enriched
Calmodulin	1436.73	1569.5	1011.56	1438.62	1814.7	1207.39	1317.83	1639.15	1814.34	702.197	1227.01	937.257
Calumenin	558.791	674.918	97.4323	353.8	356.613	735.69	109.663	177.703	168.091	279.242	541.837	103.887
Calumenin	73.0199	9.94735	9.62523	10.5465	0.965948	16.916	143.103	13.6041	231.533	182.042	154.384	358.102
Calbindin	28.6769	32.1857	3.12546	18.3066	31.9028	17.5816	435.583	662.236	979.91	164.753	344.041	178.808
Calmodulin	102.615	90.7779	18.4928	81.1647	102.727	178.565	56.2494	97.7029	87.2008	76.7738	290.747	132.669
Calumenin	40.1015	29.3814	209.382	44.4321	11.7705	36.1518	38.9228	16.8881	55.2779	24.6618	30.8479	222.055
Calumenin	32.0648	16.3143	8.48786	12.2621	7.52246	7.22936	93.8628	41.0435	46.1634	58.4414	65.3793	73.8284
Neurocalcin	112.072	103.697	61.8055	114.743	105.334	104.805	75.9177	91.3037	84.8906	46.2519	75.9243	61.5087
Fig 5 - S3E
normalized expression (tpm)
subunit	other cells						nematocyte-enriched
Nckx5	11.4729	8.71704	1.22643	3.07376	5.9291	18.459	4.28021	3.73144	3.38877	11.0375	27.7518	11.252
Nac3	21.6697	15.1851	14.2603	17.1243	35.251	12.8608	4.86956	6.30897	3.27459	2.77241	4.05451	5.39624
Nac1	2.73839	6.35995	4.08768	9.9986	8.5138	14.6027	11.5127	8.06755	11.0611	5.75e-08	11.666	0
Nckx2	13.7195	9.61572	13.5698	6.2109	10.042	6.47484	0.637901	1.80057	1.1821	2.22869	3.39613	2.61515
Fig 5 - S3F
normalized expression (tpm)
subunit	other cells						nematocyte-enriched
Atp2b2	235.833	167.356	224.496	101.511	110.863	155.148	126.172	42.5419	157.934	97.8766	177.753	219.485
Atp2b3.1	66.8353	43.345	54.2123	55.1104	63.2593	54.7929	18.9799	12.2655	27.0764	13.023	21.7821	14.2443
Atp2b3.2	28.6705	14.8667	17.2547	22.6039	26.284	18.8719	30.1921	12.3753	25.5801	13.2315	22.9264	19.8184
Atp2b1	16.058	12.0321	13.4495	10.6391	19.1963	10.2597	11.2736	6.99935	17.6422	4.26525	8.84993	5.26664
